# Supplementary material for: Multilevel Interventions and Racial/Ethnic Health Disparities
Source: Oxford University Press journal article supplement (doi:10.1093/jncimonographs/lgs015), 2012-05-01
Supplement: lgs015_Supplementary_Data.zip [file lgs015_Supplementary_Data.zip]

Archive with 3 entries (3 files):
- jnci-JNCI-11-1568-s02.xlsx
- jnci-JNCI-11-1568-s03.xlsx
- jnci-JNCI-11-1568-s01.pdf
