# Supplementary material for: Multilevel Interventions and Racial/Ethnic Health Disparities
Source: Oxford University Press journal article supplement (doi:10.1093/jncimonographs/lgs015), 2012-05-01
Supplement: lgs015_Supplementary_Data.zip [file lgs015_Supplementary_Data.zip › jnci-JNCI-11-1568-s01.pdf]

## Appendix 1. Literature Search Methods Used by The Scientific Consulting Group, Inc. (SCG)

SCG collaborated with two of the manuscript's authors, Drs. Irene Prabhu Das and Sherri Sheinfeld Gorin, on the literature searches for this manuscript. SCG performed multiple successive literature searches using various search terms to identify publications relevant to research on multilevel interventions to reduce health disparities. Search results were to include articles that discussed multilevel (three) interventions to reduce health disparities. SCG reviewed the abstracts for the final set of publications generated by each search and selected publications of potential relevance to the topic. SCG submitted abstracts of these selected publications to Dr. Sheinfeld Gorin for further review by her, followed by coding by her and other collaborators on the paper (Drs. Hoda Badr and Paul Krebs). SCG also obtained full text articles for review by the collaborators.

All searches were limited to articles published in the United States in English and between January 2000 and July 2011. This section describes the methods that SCG used to conduct each search.

### Search 1A and 1B. (1097 articles)

1A. SCG conducted PubMed searches using the following MeSH terms, alone and in combination, in accord with other searches used in this volume:

|                                   |                                    |
|-----------------------------------|------------------------------------|
| Community Institutional Relations | Multilevel Intervention            |
| Health Personnel                  | Multilevel Intervention Strategies |
| Health Status Disparities         | Multilevel Interventions           |
| Healthcare Disparities            | Patient Care Team                  |
| Institutional Management Teams    | United States                      |

1B. Guided by a recent review, SCG ran an additional search for trials with comparison groups: Beach MC, Gary TL, Price EG, Robinson K, Gozu A, Palacio A, Smarth C, Jenckes M, Feuerstein C, Bass EB, Powe NR, Cooper LA. Improving health care quality for racial/ethnic minorities: a systematic review of the best evidence regarding provider and organization interventions. *BMC Public Health*. 2006;24(6):104:

|                           |                          |
|---------------------------|--------------------------|
| Attitude                  | Intervention             |
| Comparison                | Low Income               |
| Competence                | Minority Groups          |
| Competency                | Multicultural            |
| Competent                 | Nurses                   |
| Curriculum                | Physicians               |
| Education                 | Physicians, Family       |
| Experience                | Physicians, Primary Care |
| General Practitioners     | Population Groups        |
| Health Personnel          | Poverty                  |
| Health Status Disparities | Training                 |
| Healthcare Disparities    | Transcultural            |

Limits:

Clinical Trial  
Randomized Controlled Trial,  
Clinical Trial, Phase I

Clinical Trial, Phase II  
Clinical Trial, Phase III  
Clinical Trial, Phase IV  
Comparative Study  
Controlled Clinical Trial  
English  
Multicenter Study  
Research Support, American Recovery and  
Reinvestment Act  
Research Support, NIH Extramural  
Research Support, NIH Intramural  
Research Support, U.S. Government  
Research Support, U.S. Government Non  
PHS  
Research Support, U.S. Government PHS  
Twin Study  
Publication Date from 2000/01/01 to  
2011/07/07

Limits: English, Publication Date from 2000/01/01 to 2011/07/07

This set of results was not reviewed by SCG, but the search parameters were sent to Drs. Prabhu Das and Sheinfeld Gorin for their review. Dr. Sheinfeld Gorin reviewed the abstracts, and suggested additional search strategies.

### **Search 2A and 2B. (15 articles)**

Drs. Sheinfeld Gorin and Prabhu Das asked SCG to further target the search to obtain three-level interventions. After an initial review by SCG, all of these papers were systematically coded for inclusion by Drs. Sheinfeld Gorin, Badr, and Krebs, using full text.

### **Search 2A:**

PubMed MeSH terms:

Community Institutional Relations  
Community-Based Participatory Research  
Family  
Health Personnel  
Health Status Disparities  
Healthcare Disparities  
Institutional Management Teams

Multilevel Intervention  
Multilevel Intervention Strategies  
Multilevel Interventions  
Patient Care Team  
Social Ecological Theory  
Systems Theory  
United States

Limits:

Clinical Trial  
Clinical Trial, Phase I  
Clinical Trial, Phase II  
Clinical Trial, Phase III  
Clinical Trial, Phase IV

Comparative Study  
Consensus Development Conference  
Consensus Development Conference  
English  
Government Publications

Guideline  
Multicenter Study  
NIH, Controlled Clinical Trial  
Randomized Controlled Trial  
Research Support, NIH Extramural  
Research Support, NIH Intramural  
Research Support, U.S. Government

Research Support, U.S. Government, Non PHS  
Research Support, U.S. Government, PHS  
Twin Study  
Validation Studies  
Publication Date from 2000/01/01 to 2011/07/08

1. Barnidge E, Baker EA, Motton F, Rose F, Fitzgerald T. A participatory method to identify root determinants of health: the heart of the matter. *Prog Community Health Partnersh.* 2010;4(1):55-63.
2. Chau TS, Islam N, Tandon D, Ho-Asjoe H, Rey M. Using community-based participatory research as a guiding framework for health disparities research centers. *Prog Community Health Partnersh.* 2007;1(2):195-205.
3. Dobransky-Fasiska D, Brown C, Pincus HA, et al. Developing a community-academic partnership to improve recognition and treatment of depression in underserved African American and white elders. *Am J Geriatr Psychiatry.* 2009 Nov;17(11):953-964.
4. Goldmon M, Roberson JT, Carey T, et al. The data collection/data distribution center: building a sustainable African-American church-based research network. *Prog Community Health Partnersh.* 2008;2(3):205-224.
5. Grigg-Saito D, Och S, Liang S, Toof R, Silka L. Building on the strengths of a Cambodian refugee community through community-based outreach. *Health Promot Pract.* 2008 Oct;9(4):415-425.
6. Grzywacz JG, Arcury TA, Marin A, Carrillo L, Coates ML, Quandt SA. Using lay health promoters in occupational health: outcome evaluation in a sample of Latino poultry-processing workers. *New Solut.* 2009;19(4):449-466.
7. Heisler M, Spencer M, Forman J, et al. Participants' assessments of the effects of a community health worker intervention on their diabetes self-management and interactions with healthcare providers. *Am J Prev Med.* 2009;37(6S1):S270-S279.
8. Hull PC, Canedo JR, Reece MC, et al. Using a participatory research process to address disproportionate Hispanic cancer burden. *J Health Care Poor Underserved.* 2010;21(1S):95-113.
9. Plescia M, Groblewski M, Chavis L. A lay health advisor program to promote community capacity and change among change agents. *Health Promot Pract.* 2008;9(4):434-439.
10. Scarinci IC, Johnson RE, Hardy C, Marron J, Partridge EE. Planning and implementation of a participatory evaluation strategy: a viable approach in the evaluation of community-based participatory programs addressing cancer disparities. *Eval Program Plann.* 2009;32(3):221-228.
11. Story L, Hinton A, Wyatt SB. The role of community health advisors in community-based participatory research. *Nurs Ethics.* 2010;17(1):117-126.
12. Tanjasiri SP, Tran JH, Palmer PH, et al. Developing a community-based collaboration to reduce cancer health disparities among Pacific Islanders in California. *Pac Health Dialog.* 2007;14(1):119-127.
13. Valente TW, Fujimoto K, Palmer P, Tanjasiri SP. A network assessment of community-based participatory research: linking communities and universities to reduce cancer disparities. *Am J Public Health.* 2010;100(7):1319-1325.

**Search 2B:**

PubMed MeSH terms:  
Delivery of Health Care  
Health Status Disparities  
Healthcare Disparities  
Intervention  
Minority Health

Limits:

Clinical Trial  
Clinical Trial, Phase I  
Clinical Trial, Phase II  
Clinical Trial, Phase III  
Clinical Trial, Phase IV  
Comparative Study  
Consensus Development Conference  
Consensus Development Conference  
English  
Government Publications  
Guideline  
Multicenter Study

NIH, Controlled Clinical Trial  
Randomized Controlled Trial  
Research Support, NIH Extramural  
Research Support, NIH Intramural  
Research Support, U.S. Government  
Research Support, U.S. Government, Non  
PHS  
Research Support, U.S. Government, PHS  
Twin Study  
Validation Studies  
Publication Date from 2000/01/01 to  
2011/07/08

14. Bogart LM, Uyeda K. Community-based participatory research: partnering with communities for effective and sustainable behavioral health interventions. *Health Psychol.* 2009;28(4):391-393.
15. Kobetz E, Mendoza AD, Barton B, et al. Mammography use among Haitian women in Miami, Florida: an opportunity for intervention. *J Immigr Minor Health.* 2010;12(3):418-421.

**Targeted Snowballing (22 articles)**

In addition to the formal PubMed literature searches, SCG performed a Google search to identify publications that might have been missed by the formal PubMed searches either because of a search strategy limitation or because the publication was not in PubMed. The initial Google search term was “multilevel intervention” and “disparities.” All hits in the first two pages generated by Google were reviewed for relevance to the manuscript topic criteria. (We have found that only hits in the first two Google pages are likely to be highly relevant to the search terms). These items provided information about current and past studies and initiatives focusing on health disparities that had a multilevel intervention component. We reviewed these items to identify key investigators and important articles on this topic. We then conducted PubMed searches using the investigators’ names and other key terms identified through the Google searches to locate relevant published studies. After a discussion with Dr. Sheinfeld Gorin, SCG also conducted Google and PubMed searches on NIH’s Centers for Population Health and Health Disparities (CPHHD) to identify publications by grantees. Through this initial search strategy, SCG identified the following 22 articles and submitted them to Drs. Sheinfeld Gorin and Prabhu Das for further review. Dr. Sheinfeld Gorin reviewed these papers for inclusion, alongside Drs. Badr and Krebs.

1. Beresford SA, Bishop SK, Brunner NL, et al. Environmental assessment at worksites after a multilevel intervention to promote activity and changes in eating: the PACE project. *J Occup Environ Med*. 2010;52(S1):S22-S28.
2. Berg M, Coman E, Schensul JJ. Youth Action Research for Prevention: a multi-level intervention designed to increase efficacy and empowerment among urban youth. *Am J Community Psychol*. 2009;43(3-4):345-359.
3. Bogart LM, Uyeda K. Community-based participatory research: partnering with communities for effective and sustainable behavioral health interventions. *Health Psychol*. 2009;28(4):391-393.
4. Brown DR, Hernandez A, Saint-Jean G, et al. A participatory action research pilot study of urban health disparities using rapid assessment response and evaluation. *Am J Public Health*. 2008;98(1):28-38.
5. Chau TS, Islam N, Tandon D, Ho-Asjoe H, Rey M. Using community-based participatory research as a guiding framework for health disparities research centers. *Prog Community Health Partnersh*. 2007;1(2):195-205.
6. Eisenmann JC, Gentile DA, Welk GJ et al. SWITCH: rationale, design, and implementation of a community, school, and family-based intervention to modify behaviors related to childhood obesity. *BMC Public Health*. 2008;8:223.
7. Emmons KM, Stoddard AM, Gutheil C, Suarez EG, Lobb R, Fletcher R. Cancer prevention for working class, multi-ethnic populations through health centers: the healthy directions study. *Cancer Causes Control*. 2003;14(8):727-737.
8. Emmons KM, Stoddard AM, Fletcher R, et al. Cancer prevention among working class, multiethnic adults: results of the healthy directions-health centers study. *Am J Public Health*. 2005;95(7):1200-1205.
9. Fuller CM, Galea S, Caceres W, Blaney S, Sisco S, Vlahov D. Multilevel community-based intervention to increase access to sterile syringes among injection drug users through pharmacy sales in New York City. *Am J Public Health*. 2007;97(1):117-124.
10. Gehlert S, Coleman R. Using community-based participatory research to ameliorate cancer disparities. *Health Soc Work*. 2010;35(4):302-309.
11. Holmes JH, Lehman A, Hade E, et al. Challenges for multilevel health disparities research in a transdisciplinary environment. *Am J Prev Med*. 2008;35(2S):S182-S192.
12. Kelley MA, Baldyga W, Barajas F, Rodriguez-Sanchez M. Capturing change in a community--university partnership: Si Se Puede! Project. *Prev Chronic Dis*. 2005;2(2):A22.
13. Lasser KE, Murillo J, Medlin E, Lisboa S, Valley-Shah L, Fletcher RH, et al. A multilevel intervention to promote colorectal cancer screening among community health center patients: results of a pilot study. *BMC Fam Pract*. 2009;10:37.
14. Margolis PA, Stevens R, Bordley WC, et al. From concept to application: the impact of a community-wide intervention to improve the delivery of preventive services to children. *Pediatrics* 2001;108(3):E42.
15. Martinez SM, Arredondo EM, Perez G, Baquero B. Individual, social, and environmental barriers to and facilitators of physical activity among Latinas living in San Diego County: focus group results. *Fam Community Health*. 2009;32(1):22-33.
16. Schensul JJ, Levy JA, Disch WB. Individual, contextual, and social network factors affecting exposure to HIV/AIDS risk among older residents living in low-income senior housing complexes. *J Acquir Immune Defic Syndr* 2003;33(S2):S138-S152.
17. Schensul JJ, Radda K, Coman E, Vazquez E. Multi-level intervention to prevent influenza infections in older low income and minority adults. *Am J Community Psychol*. 2009;43(3-4):313-329.
18. Sorensen G, Emmons K, Hunt MK, et al. Model for incorporating social context in health behavior interventions: applications for cancer prevention for working-class, multiethnic populations. *Prev Med*. 2003;37(3):188-197.

19. Sorensen G, Barbeau E, Hunt MK, Emmons K. Reducing social disparities in tobacco use: a social-contextual model for reducing tobacco use among blue-collar workers. *Am J Public Health*. 2004;94(2):230-239.
20. Sorensen G, Stoddard AM, Dubowitz T, et al. The influence of social context on changes in fruit and vegetable consumption: results of the healthy directions studies. *Am J Public Health*. 2007;97(7):1216-1227.
21. Taplin SH, Haggstrom D, Jacobs T, et al. Implementing colorectal cancer screening in community health centers: addressing cancer health disparities through a regional cancer collaborative. *Med Care*. 2008;46(9S1):S74-S83.
22. Warnecke RB, Oh A, Breen N, et al. Approaching health disparities from a population perspective: the National Institutes of Health Centers for Population Health and Health Disparities. *Am J Public Health*. 2008;98(9):1608-1615.

### **The WISEWOMAN Program (19 articles)**

Initial Google searches found information on the Centers for Disease Control and Prevention's WISEWOMAN program. This program supports multilevel interventions to reduce disparities in cardiovascular disease at multiple sites around the United States. SCG conducted a PubMed search using the term "Wisewoman" to identify articles about the program. This search yielded 43 articles that were sent to Drs. Sheinfeld Gorin and Prabhu Das and were reviewed by Dr. Sheinfeld Gorin. She selected the following five articles that were considered relevant to the review; these were systematically evaluated for possible inclusion by Drs. Sheinfeld Gorin, Badr, and Krebs:

1. Jilcott SB, Keyserling TC, Samuel-Hodge CD, et al. Linking clinical care to community resources for cardiovascular disease prevention: the North Carolina Enhanced WISEWOMAN project. *J Womens Health* (Larchmt ). 2006;15(5):569-583.
2. Keyserling TC, Samuel Hodge CD, Jilcott SB, et al. Randomized trial of a clinic-based, community-supported, lifestyle intervention to improve physical activity and diet: the North Carolina enhanced WISEWOMAN project. *Prev Med*. 2008;46(6):499-510.
3. Rosamond WD, Ammerman AS, Holliday JL, et al. Cardiovascular disease risk factor intervention in low-income women: the North Carolina WISEWOMAN project. *Prev Med*. 2000;31(4):370-379.
4. Stoddard AM, Palombo R, Troped PJ, Sorensen G, Will JC. Cardiovascular disease risk reduction: the Massachusetts WISEWOMAN project. *J Womens Health* (Larchmt ). 2004;13(5):539-546.
5. Yancey AK. Building capacity to prevent and control chronic disease in underserved communities: expanding the wisdom of WISEWOMAN in intervening at the environmental level. *J Womens Health* (Larchmt ). 2004;13(5):644-649.

Notes: Wisewoman Project

Dr. Sheinfeld Gorin selected the following additional publications from the WISEWOMAN Program as warranting further consideration by the manuscript collaborators:

1. Besculides M, Zaveri H, Farris R, Will J. Identifying best practices for WISEWOMAN programs using a mixed-methods evaluation. *Prev Chronic Dis*. 2006;3(1):A07.
2. Farris RP, Will JC, Khavjou O, Finkelstein EA. Beyond effectiveness: evaluating the public health impact of the WISEWOMAN program. *Am J Public Health*. 2007;97(4):641-647.
3. Finkelstein EA, Khavjou O, Will JC. Cost-effectiveness of WISEWOMAN, a program aimed at reducing heart disease risk among low-income women. *J Womens Health* (Larchmt ). 2006;15(4):379-89.

4. Finkelstein EA, Wittenborn JS, Farris RP. Evaluation of public health demonstration programs: the effectiveness and cost-effectiveness of WISEWOMAN. *J Womens Health* (Larchmt ). 2004;13(5):625-633.
5. Gregory-Mercado KY, Will J, True S, et al. A combined approach to women's health is associated with a greater likelihood of repeat mammography in a population of financially disadvantaged women. *Prev Chronic Dis*. 2007;4(4):A89.
6. Jilcott SB, Macon ML, Rosamond WD, et al. Implementing the WISEWOMAN program in local health departments: staff attitudes, beliefs, and perceived barriers. *J Womens Health* (Larchmt ). 2004;13(5):598-606.
7. Lewis SD, Johnson VR, Farris RP, Will JC. Using success stories to share knowledge and lessons learned in health promotion. *J Womens Health* (Larchmt ). 2004;13(5):616-624.
8. Mays GP, Hesketh HA, Ammerman AS, Stockmyer CK, Johnson TL, Bayne-Smith M. Integrating preventive health services within community health centers: lessons from WISEWOMAN. *J Womens Health* (Larchmt ). 2004;13(5):607-615.
9. Mobley LR, Root ED, Finkelstein EA, Khavjou O, Farris RP, Will JC. Environment, obesity, and cardiovascular disease risk in low-income women. *Am J Prev Med*. 2006;30(4):327-332.
10. Sanders CG, Aycock N, Samuel-Hodge CD, et al. Extending the reach of public health nutrition: training community practitioners in multilevel approaches. *J Womens Health* (Larchmt ). 2004;13(5):589-597.
11. Staten LK, Gregory-Mercado KY, Ranger-Moore J, et al. Provider counseling, health education, and community health workers: the Arizona WISEWOMAN project. *J Womens Health* (Larchmt ). 2004;13(5):547-556.
12. Vaid I, Wigington C, Borbely D, Ferry P, Manheim D. WISEWOMAN: Addressing the needs of women at high risk for cardiovascular disease. *J Womens Health* (Larchmt). 2011 Jun 13.
13. Viadro CI, Farris RP, Will JC. The WISEWOMAN projects: lessons learned from three states. *J Womens Health* (Larchmt). 2004;13(5):529-538.
14. Will JC, Loo RK. The WISEWOMAN program: reflection and forecast. *Prev Chronic Dis* 2008;5(2):A56.

### Targeted Searching: Exemplar authors and papers (44 Articles)

After reviewing the initial articles and abstracts submitted by SCG, Drs. Gorin and Prabhu Das met with SCG staff to discuss additional search strategies including “chronic care model,” “community based participatory research,” “Body and Soul,” and “Healthy Body/Healthy Spirit.” The names of several authors known to conduct relevant research also were suggested. SCG staff also reviewed references from the following key articles located during previous searches or suggested by Drs. Sheinfeld Gorin and Prabhu Das:

1. Holmes JH, Lehman A, Hade E, et al. Challenges for multilevel health disparities research in a transdisciplinary environment. *Am J Prev Med*. 2008;35(2S):S182-S192.
2. Lasser KE, Murillo J, Medlin E, et al. A multilevel intervention to promote colorectal cancer screening among community health center patients: results of a pilot study. *BMC Fam Pract*. 2009;10:37.
3. Ogedegbe G, Tobin JN, Fernandez S, et al. Counseling African Americans to Control Hypertension (CAATCH) trial: a multi-level intervention to improve blood pressure control in hypertensive blacks. *Circ Cardiovasc Qual Outcomes*. 2009;2(3):249-256.
4. Warnecke RB, Oh A, Breen N, et al. Approaching health disparities from a population perspective: the National Institutes of Health Centers for Population Health and Health Disparities. *Am J Public Health*. 2008;98(9):1608-1615.

Some of the keyword and author search terms did not identify additional relevant publications when searched in PubMed. Also, some of the reference reviews for the above-listed articles did not generate additional relevant publications. The searches and reviews that identified articles are described in the bulleted sections below.

- SCG performed a PubMed search that included the terms “chronic care model,” “health status disparities,” and “healthcare disparities” that yielded 9 articles. SCG reviewed and selected 6 articles for the manuscript authors’ review. Drs. Sheinfeld Gorin reviewed these papers for inclusion.
  1. Chin MH, Drum ML, Guillen M, et al. Improving and sustaining diabetes care in community health centers with the health disparities collaboratives. *Med Care*. 2007;45(12):1135-1143.
  2. Franks P, Fiscella K. Reducing disparities downstream: prospects and challenges. *J Gen Intern Med*. 2008;23(5):672-677.
  3. Grossman E, Keegan T, Lessler AL, et al. Inside the health disparities collaboratives: a detailed exploration of quality improvement at community health centers. *Med Care*. 2008;46(5):489-496.
  4. Jenkins C, Pope C, Magwood G, et al. Expanding the chronic care framework to improve diabetes management: the REACH case study. *Prog Community Health Partnersh*. 2010;4(1):65-79.
  5. Kristofco RE, Lorenzi NM. How quality improvement interventions can address disparities in depression. *J Contin Educ Health Prof*. 2007;27 Suppl 1:S33-S39.
  6. Narva AS. Optimal preparation for ESRD. *Clin J Am Soc Nephrol*. 2009;4 Suppl 1:S110-S113.
- SCG performed a PubMed search using the terms “cancer screening,” “health status disparities,” and “intervention studies” that yielded 9 articles. SCG reviewed and selected one article for further review that Dr. Sheinfeld Gorin reviewed for inclusion:
  7. Hiatt RA, Pasick RJ, Stewart S, et al. Community-based cancer screening for underserved women: design and baseline findings from the Breast and Cervical Cancer Intervention Study. *Prev Med*. 2001;33(3):190-203.
- SCG performed a PubMed search using the following search strategy: “community participatory research” AND multilevel AND intervention and selected the following 8 of the articles located through the search; Dr. Sheinfeld Gorin reviewed these for inclusion:
  8. Aronson RE, Wallis AB, O’Campo PJ, Whitehead TL, Schafer P. Ethnographically informed community evaluation: a framework and approach for evaluating community-based initiatives. *Matern Child Health J*. 2007;11(2):97-109.
  9. Artinian NT, Warnecke RB, Kelly KM, et al. Advancing the science of health disparities research. *Ethn Dis*. 2007;17(3):427-433.
  10. Corbie-Smith G, Adimora AA, Youmans S, et al. Project GRACE: a staged approach to development of a community-academic partnership to address HIV in rural African American communities. *Health Promot Pract*. 2011;12(2):293-302.
  11. Corbie-Smith G, Akers A, Blumenthal C, et al. Intervention mapping as a participatory approach to developing an HIV prevention intervention in rural African American communities. *AIDS Educ Prev*. 2010;22(3):184-202.

12. Fuller CM, Galea S, Caceres W, Blaney S, Sisco S, Vlahov D. Multilevel community-based intervention to increase access to sterile syringes among injection drug users through pharmacy sales in New York City. *Am J Public Health*. 2007;97(1):117-124.
  13. Jones L, Wright K, Wright A, Brown ND, Broussard M, Hogan V. The Healthy African American Families' risk communications initiative: using community partnered participatory research to address preterm birth at the local level. *Ethn Dis*. 2010;20(1 Suppl 2):S2-S5.
  14. Storck M, Beal T, Bacon JG, Olsen P. Behavioral and mental health challenges for indigenous youth: research and clinical perspectives for primary care. *Pediatr Clin North Am*. 2009;56(6):1461-1479.
  15. Wynn TA, Taylor-Jones MM, Johnson RE, Bostick PB, Fouad M. Using community-based participatory approaches to mobilize communities for policy change. *Fam Community Health*. 2011 Jan;34 Suppl 1:S102-S114.
- SCG conducted PubMed searches and located one relevant article that included church-supported interventions by exemplar authors, including "Healthy Body/Healthy Spirit" and "Body and Soul." One of the four Body and Soul articles was relevant to the manuscript (Wynn et al., 2011). This was reviewed by Dr. Sheinfeld Gorin:
    16. Allicock M, Campbell MK, Valle CG, et al. Evaluating the implementation of peer counseling in a church-based dietary intervention for African Americans. *Patient Educ Couns*. 2010;81(1):37-42.
    17. Baskin ML, Resnicow K, Campbell MK. Conducting health interventions in black churches: a model for building effective partnerships. *Ethn Dis*. 2001;11(4):823-833.
    18. Campbell MK, Resnicow K, Carr C, Wang T, Williams A. Process evaluation of an effective church-based diet intervention: Body & Soul. *Health Educ Behav*. 2007;34(6):864-880.
    19. Wynn TA, Anderson-Lewis C, Johnson R, et al. Developing a community action plan to eliminate cancer disparities: lessons learned. *Prog Community Health Partnersh*. 2011;5(2):161-168.
  - SCG performed a PubMed search using the phrase "community-based participatory research" in the Title words field. This search yielded 273 articles. SCG reviewed the abstracts for potential relevance to the manuscript and selected 14 articles for further review by the manuscript collaborators. These were reviewed for inclusion by Dr. Sheinfeld Gorin.
    20. Andrews JO, Bentley G, Crawford S, Pretlow L, Tingen MS. Using community-based participatory research to develop a culturally sensitive smoking cessation intervention with public housing neighborhoods. *Ethn Dis*. 2007;17(2):331-337.
    21. Balcazar H, Rosenthal L, De HH, et al. Use of community-based participatory research to disseminate baseline results from a cardiovascular disease randomized community trial for Mexican Americans living in a U.S.-Mexico border community. *Educ Health (Abingdon)*. 2009;22(3):279.
    22. Berge JM, Mendenhall TJ, Doherty WJ. Using Community-based Participatory Research (CBPR) To Target Health Disparities in Families. *Fam Relat*. 2009;58(4):475-488.
    23. Christopher S, Saha R, Lachapelle P, et al. Applying Indigenous Community-Based Participatory Research Principles to Partnership Development in Health Disparities Research. *Fam Community Health*. 2011;34(3):246-255.
    24. Cummins C, Doyle J, Kindness L, et al. Community-based participatory research in Indian country: improving health through water quality research and awareness. *Fam Community Health*. 2010;33(3):166-174.
    25. Davis DS, Goldmon MV, Coker-Appiah DS. Using a Community-Based Participatory Research Approach to Develop a Faith-Based Obesity Intervention for African American

- Children. *Health Promot Pract*. [Published online ahead of print May 3, 2011.] 2011;12(6):811-822.
26. Downs TJ, Ross L, Patton S, et al. Complexities of holistic community-based participatory research for a low income, multi-ethnic population exposed to multiple built-environment stressors in Worcester, Massachusetts. *Environ Res*. 2009;109(8):1028-1040.
  27. Ferre CD, Jones L, Norris KC, Rowley DL. The Healthy African American Families (HAAF) project: from community-based participatory research to community-partnered participatory research. *Ethn Dis*. 2010;20(1 Suppl 2):S2-S8.
  28. Garcia C, Hermann D, Bartels A, Matamoros P, Dick-Olson L, Guerra de PJ. Development of Project Wings Home Visits, a Mental Health Intervention for Latino Families Using Community-Based Participatory Research. *Health Promot Pract*. [Published online ahead of print April 8, 2011.]
  29. Hebert JR, Brandt HM, Armstead CA, Adams SA, Steck SE. Interdisciplinary, translational, and community-based participatory research: finding a common language to improve cancer research. *Cancer Epidemiol Biomarkers Prev*. 2009;18(4):1213-1217.
  30. Horowitz CR, Goldfinger JZ, Muller SE, et al. A model for using community-based participatory research to address the diabetes epidemic in East Harlem. *Mt Sinai J Med*. 2008;75(1):13-21.
  31. Johnson CE, Ali SA, Shipp MP. Building community-based participatory research partnerships with a Somali refugee community. *Am J Prev Med*. 2009;37(6 Suppl 1):S230-S236.
  32. Strickland CJ. Challenges in community-based participatory research implementation: experiences in cancer prevention with Pacific Northwest American Indian tribes. *Cancer Control*. 2006;13(3):230-236.
  33. Tanjasiri SP, Tran JH, Palmer PH, et al. Developing a community-based collaboration to reduce cancer health disparities among Pacific Islanders in California. *Pac Health Dialog*. 2007;14(1):119-127.
- SCG reviewed the 46 references in the Holmes article and selected one reference in addition to the Holmes article that was reviewed for inclusion by Dr. Sheinfeld Gorin:
    34. Acevedo-Garcia D, Lochner KA, Osypuk TL, Subramanian SV. Future directions in residential segregation and health research: a multilevel approach. *Am J Public Health*. 2003;93(2):215-221.
    35. Holmes JH, Lehman A, Hade E, et al. Challenges for multilevel health disparities research in a transdisciplinary environment. *Am J Prev Med*. 2008;35(2 Suppl):S182-S192.
  - SCG reviewed the 30 references in the Lasser article and selected two references for further review that was reviewed for inclusion by Dr. Sheinfeld Gorin:
    36. Chen LA, Santos S, Jandorf L, et al. A program to enhance completion of screening colonoscopy among urban minorities. *Clin Gastroenterol Hepatol*. 2008;6(4):443-450.
    37. Nash D, Azeez S, Vlahov D, Schori M. Evaluation of an intervention to increase screening colonoscopy in an urban public hospital setting. *J Urban Health*. 2006;83(2):231-243.
  - SCG obtained the full text version of an article originally identified through a PubMed search for “multilevel intervention” and “disparities” (Ogedegbe G et al. 2009), reviewed the 42 references in the article, identified one relevant referenced article, and included the original article and the referenced article in this batch of 44 articles. This paper was evaluated for inclusion by Drs. Sheinfeld Gorin, Badr, and Krebs.

38. Dennison CR, Post WS, Kim MT, et al. Underserved urban African American men: hypertension trial outcomes and mortality during 5 years. *Am J Hypertens*. 2007;20(2):164-171.
  39. Ogedegbe G, Tobin JN, Fernandez S, et al. Counseling African Americans to Control Hypertension (CAATCH) trial: a multi-level intervention to improve blood pressure control in hypertensive blacks. *Circ Cardiovasc Qual Outcomes*. 2009;2(3):249-256.
- SCG searched for updates to a 2003 article about the “Community Action Against Asthma” research project. SCC located updated articles and submitted them with the original article as part of this batch of 44 articles; these were reviewed for inclusion by Drs. Sheinfeld Gorin, Badr, and Krebs:
    40. Edgren KK, Parker EA, Israel BA, et al. Community involvement in the conduct of a health education intervention and research project: Community Action Against Asthma. *Health Promot Pract*. 2005;6(3):263-269.
    41. Parker EA, Israel BA, Robins TG, et al. Evaluation of Community Action Against Asthma: a community health worker intervention to improve children's asthma-related health by reducing household environmental triggers for asthma. *Health Educ Behav*. 2008;35(3):376-395.
    42. Parker E, Israel B, Williams M, et al. Community Action Against Asthma: examining the partnership process of a community-based participatory research project. *J Gen Intern Med*. 2003;18:558–567.
  - SCG conducted a PubMed search for articles authored by Dr. Electra Paskett and identified 17 publications. SCG reviewed abstracts of these publications and identified two relevant articles. These were reviewed for inclusion by Drs. Sheinfeld Gorin, Badr, and Krebs:
    43. Murray DM, Pennell M, Rhoda D, Hade EM, Paskett ED. Designing studies that would address the multilayered nature of health care. *J Natl Cancer Inst Monogr*. 2010;2010(40):90-96.
    44. Paskett ED, Cooper MR, Stark N, et al. Clinical trial enrollment of rural patients with cancer. *Cancer Pract*. 2002 Jan;10(1):28-35.

To evaluate the outcome of the SWITCH trial, one paper was added (Gentile et al., 2009). The Hiatt et al. paper was substituted for the Hiatt et al. (2001) paper to examine the outcomes of the Breast and Cervical Cancer Intervention study, rather than the findings at baseline. The following 29 papers were included in the systematic review, and were coded independently using standardized forms by Drs. Badr, Krebs, and Sheinfeld Gorin:

1. Parker E, Israel B, Williams M, et al. Community Action Against Asthma: examining the partnership process of a community-based participatory research project. *J Gen Intern Med*. 2003;18:558–567.
2. Edgren KK, Parker EA, Israel BA, et al. Community involvement in the conduct of a health education intervention and research project: Community Action Against Asthma. *Health Promot Pract*. 2005;6(3):263-269.
3. Parker EA, Israel BA, Robins TG, et al. Evaluation of Community Action Against Asthma: a community health worker intervention to improve children's asthma-related health by reducing household environmental triggers for asthma. *Health Educ Behav*. 2008;35(3):376-395.
4. Nash D, Azeez S, Vlahov D, Schori M. Evaluation of an intervention to increase screening colonoscopy in an urban public hospital setting. *J Urban Health*. 2006;83(2):231-243.

5. Davis DS, Goldmon MV, Coker-Appiah DS. Using a Community-Based Participatory Research Approach to Develop a Faith-Based Obesity Intervention for African American Children. *Health Promot Pract*. [Published online ahead of print May 3, 2011.] 2011;12(6):811-822.
6. Downs TJ, Ross L, Patton S, et al. Complexities of holistic community-based participatory research for a low income, multi-ethnic population exposed to multiple built-environment stressors in Worcester, Massachusetts. *Environ Res*. 2009;109(8):1028-1040.
7. Ferre CD, Jones L, Norris KC, Rowley DL. The Healthy African American Families (HAAF) project: from community-based participatory research to community-partnered participatory research. *Ethn Dis*. 2010;20(1 Suppl 2):S2-S8.
8. Garcia C, Hermann D, Bartels A, Matamoros P, Dick-Olson L, Guerra de PJ. Development of Project Wings Home Visits, a Mental Health Intervention for Latino Families Using Community-Based Participatory Research. *Health Promot Pract*. Published online ahead of print April 8, 2011.
9. Balcazar H, Rosenthal L, De HH, et al. Use of community-based participatory research to disseminate baseline results from a cardiovascular disease randomized community trial for Mexican Americans living in a U.S.-Mexico border community. *Educ Health*. (Abingdon ) 2009;22(3):279.
10. Allicock M, Campbell MK, Valle CG, et al. Evaluating the implementation of peer counseling in a church-based dietary intervention for African Americans. *Patient Educ Couns*. 2010;81(1):37-42.
11. Wynn TA, Taylor-Jones MM, Johnson RE, Bostick PB, Fouad M. Using community-based participatory approaches to mobilize communities for policy change. *Fam Community Health*. 2011;34 Suppl 1:S102-S114.
12. Corbie-Smith G, Adimora AA, Youmans S, Muhammad M, Blumenthal C, Ellison A, et al. Project GRACE: a staged approach to development of a community-academic partnership to address HIV in rural African American communities. *Health Promot Pract*. 2011;12(2):293-302.
13. Hiatt RA, Pasick RJ, Stewart S, et al. Cancer Screening for Underserved Women: The Breast and Cervical Cancer Intervention Study. *Cancer Epidemiol Biomark Prev*. 2008;17: 1945-1949.
14. Jenkins C, Pope C, Magwood G, et al. Expanding the chronic care framework to improve diabetes management: the REACH case study. *Prog Community Health Partnersh*. 2010;4(1):65-79.
15. Chin MH, Drum ML, Guillen M, et al. Improving and sustaining diabetes care in community health centers with the health disparities collaboratives. *Med Care*. 2007;45(12):1135-1143.
16. Rosamond WD, Ammerman AS, Holliday JL, et al. Cardiovascular disease risk factor intervention in low-income women: the North Carolina WISEWOMAN project. *Prev Med*. 2000;31(4):370-379.
17. Stoddard AM, Palombo R, Troped PJ, Sorensen G, Will JC. Cardiovascular disease risk reduction: the Massachusetts WISEWOMAN project. *J Womens Health (Larchmt)*. 2004;13(5):539-546.
18. Schensul JJ, Radda K, Coman E, Vazquez E. Multi-level intervention to prevent influenza infections in older low income and minority adults. *Am J Community Psychol*. 2009;43(3-4):313-329.
19. Margolis PA, Stevens R, Bordley WC, et al. From concept to application: the impact of a community-wide intervention to improve the delivery of preventive services to children. *Pediatrics*. 2001;108(3):E42.
20. Kelley MA, Baldyga W, Barajas F, Rodriguez-Sanchez M. Capturing change in a community--university partnership: Si Se Puede! Project. *Prev Chronic Dis*. 2005;2(2):A22.

21. Fuller CM, Galea S, Caceres W, Blaney S, Sisco S, Vlahov D. Multilevel community-based intervention to increase access to sterile syringes among injection drug users through pharmacy sales in New York City. *Am J Public Health*. 2007;97(1):117-124.
22. Eisenmann JC, Gentile DA, Welk GJ, et al. SWITCH: rationale, design, and implementation of a community, school, and family-based intervention to modify behaviors related to childhood obesity. *BMC Public Health* 2008;8:223.
23. Emmons KM, Stoddard AM, Gutheil C, Suarez EG, Lobb R, Fletcher R. Cancer prevention for working class, multi-ethnic populations through health centers: the healthy directions study. *Cancer Causes Control*. 2003;14(8):727-737.
24. Beresford SA, Bishop SK, Brunner NL, et al. Environmental assessment at worksites after a multilevel intervention to promote activity and changes in eating: the PACE project. *J Occup Environ Med*. 2010;52(S1):S22-S28.
25. Berg M, Coman E, Schensul JJ. Youth Action Research for Prevention: a multi-level intervention designed to increase efficacy and empowerment among urban youth. *Am J Community Psychol*. 2009;43(3-4):345-359.
26. Plescia M, Groblewski M, Chavis L. A lay health advisor program to promote community capacity and change among change agents. *Health Promot Pract*. 2008;9(4):434-439.
27. Grzywacz JG, Arcury TA, Marin A, Carrillo L, Coates ML, Quandt SA. Using lay health promoters in occupational health: outcome evaluation in a sample of Latino poultry-processing workers. *New Solut*. 2009;19(4):449-466.
28. Heisler M, Spencer M, Forman J, et al. Participants' assessments of the effects of a community health worker intervention on their diabetes self-management and interactions with healthcare providers. *Am J Prev Med*. 2009;37(6S1):S270-S279.
29. Gentile DA, Welk G, Eisenmann JC, et al. Evaluation of a multiple ecological level child obesity prevention program: Switch what you Do, View, and Chew. *BMC Medicine* 2009;7:49.

**After peer-review by the Journal, the following three papers (*italicized in the list above*) were eliminated as they provided insufficient detail regarding the racial and ethnic composition of the population(s) or communities, yielding 26 papers for the final systematic review:**

1. Garcia C, Hermann D, Bartels A, Matamoros P, Dick-Olson L, Guerra de PJ. Development of Project Wings Home Visits, a Mental Health Intervention for Latino Families Using Community-Based Participatory Research. *Health Promot Pract*. Published online ahead of print April 8, 2011.]
2. Eisenmann JC, Gentile DA, Welk GJ, et al. SWITCH: rationale, design, and implementation of a community, school, and family-based intervention to modify behaviors related to childhood obesity. *BMC Public Health*. 2008;8:223.
3. Gentile DA, Welk G, Eisenmann JC, et al. Evaluation of a multiple ecological level child obesity prevention program: Switch what you Do, View, and Chew. *BMC Medicine*. 2009;7:49.
