# Supplementary material for: Multilevel Interventions and Racial/Ethnic Health Disparities
Source: Oxford University Press journal article supplement (doi:10.1093/jncimonographs/lgs015), 2012-05-01
Supplement: lgs015_Supplementary_Data.zip [file lgs015_Supplementary_Data.zip › jnci-JNCI-11-1568-s02.xlsx]

## Sheet: Descriptives
	Appendix 2. Study Description (N=26)
Article Name	Author	Year	Citation	Theory/ Model/ Cross-Cutting Constructs applied	Number of Levels	Types of Levelsa	PercentMinority at Baseline	Types of Minority	Cancer-related	Cancer Continuumb	Healthy = 1 CVD=2 Diabetes=3 Asthma=4 Other=5	Method	Comparison group (Y/N)	Process Measuresc		Findings on Process(es)c	Outcome Measures	Findings on Primary Outcome(s)	Overall Findings
deWit, R, van Dam, F., Zandbelt, L., van Buuren, A., van der Heijden, K., Leenohouts, G., & Loonstra, S. 1997. A pain education progream for chronic ancer pain patients: follow-up results from a randomized controlled trial. Pain, 73, 55-69.	Allicock	2010	Allicock M, Campbell MK, Valle CG, Barlow JN, Carr C, Meier A, et al. Evaluating the implementation of peer counseling in a church-based dietary intervention for African Americans. Patient Educ Couns 2010 Oct;81(1):37-42.	not reported	3	4,3,1	1	african american	yes	prevention	1	qualitative interviews	no	effectiveness	1	Peer counseling not optimally implemented	Increased fruit and vegetable consumption	Most participants did not recall talking to a peer counselor, but counseling was associated with greater fruit and vegetable intake	POSITIVE OUTCOME
Dalton, J.A., Keefe, F.J., Carlson, J., & Youngblood R. (2004). Tailoring cognitive-behavioral treatment for cancer pain. Pain Manag Nurs, 5, 3-18	Balcazar	2009	Balcazar H, Rosenthal L, De HH, Aguirre M, Flores L, Vasquez E, et al. Use of community-based participatory research to disseminate baseline results from a cardiovascular disease randomized community trial for Mexican Americans living in a U.S.-Mexico border community. Educ Health (Abingdon ) 2009 Dec;22(3):279.	CBPR principles, health belief model	3	5,4,1	1	mexican american	no	n/a	2	RCT	yes	not reported		Demanding recruitment, difficulty undertanding research, provided data regarding CVD risk	Enhanced cardio vascular risk profile, self-efficacy, benefits, heart-healthy behaviors	not reported	NEGATIVE PROCESS
Kwekkeboom, K. L. (2003). "Music versus distraction for procedural pain and anxiety in patients with cancer." Oncol Nurs Forum 30(3): 433-40.	Beresford	2010	Beresford SA, Bishop SK, Brunner NL, Duncan GE, McGregor BA, McLerran DF, et al. Environmental assessment at worksites after a multilevel intervention to promote activity and changes in eating: the PACE project. J Occup Environ Med 2010 Jan;52(S1):S22-S28.	ecological model	3	4,3,1	not speci-fied	20% non-white	yes	prevention	1	RCT	yes	not reported		not reported	Assessment of the worksite environment (CHEW checklist)	PA and nutrition information increased	POSITIVE OUTCOME
Kwekkeboom, K.L., Wanta, B., and Bumpus, M. 2008. Individual difference variables and the effects of progressive muscle relaxation and analgesic imagery interventions on cancer pain. J Pain Symptom Manage, 36, 604-615.	Berg	2009	Berg M, Coman E, Schensul JJ. Youth Action Research for Prevention: a multi-level intervention designed to increase efficacy and empowerment among urban youth. Am J Community Psychol 2009 Jun;43(3-4):345-59.	ecological theory identity theory social learning theory (Bandura) critical and transformative theories	3	5,3, 1	0.88	african american latino	no	n/a	5	quasi-experi-mental	yes	effectiveness	1	Drug use perceptions improved	1. Aggregate measures of client outcomes (30 day use of alcohol, marijuana, and other drugs) 2. CSAP core measures including scales for school bonding and retention, disapproval of drug use, self-esteem, social skills, assertiveness skills, perceived drug risk, attitudes toward drug use, and beliefs about peer norms 3. Selected items and scales which measure educational expectations, sexual self …	Drug use perceptions improved (i.e., toward less drug use) as did those toward alcohol and marijuana use.	POSITIVE PROCESS AND OUTCOMES
Bozcuk H, Kolagasi O, Samur M, et al. A brief information sheet on opioid effects improves quality of life in cancer patients on opioids. Internet Journal of Pain, Symptom Control & Palliative Care. 2004;2(2):12p	Chin	2007	Chin MH, Drum ML, Guillen M, Rimington A, Levie JR, Kirchhoff AC, et al. Improving and sustaining diabetes care in community health centers with the health disparities collaboratives. Med Care 2007 Dec;45(12):1135-43.	chronic care model	3	2,1,4	0.59	american indian/ alaskan native, asian pacific islander, black (non-hispanic), Hispanic/ latino (all races), other	no	n/a	3	quasi-experi-mental	yes	effectiveness	1	Diabetes care improved. .	Improved HbA1C, LDL, blood pressure	Diabetes outcomes improved. More intensive interventions helped marginally. Intervention improved multiple health outcomes.	POSITIVE PROCESS AND OUTCOMES
Dalton, JA. (1987). Educaztion for pain management: A pilot study. Patient Eduation and Counseling, 9, 155-165.	Corbie-Smith	2011	Corbie-Smith G, Adimora AA, Youmans S, Muhammad M, Blumenthal C, Ellison A, et al. Project GRACE: a staged approach to development of a community-academic partnership to address HIV in rural African American communities. Health Promot Pract 2011 Mar;12(2):293-302.	developmental model	3	5,3,1	not speci-fied: 34% to 54% of the target count-ies are African Ameri-can	African American	no	n/a	5	descriptive	no	partnership development		The intervention has led to deep engagement of all partners	not reported	not reported	POSITIVE PROCESS
	Davis	2011	Davis DS, Goldmon MV, Coker-Appiah DS. Using a Community-Based Participatory Research Approach to Develop a Faith-Based Obesity Intervention for African American Children. Health Promot Pract 2011 May 3.	socio-ecological model, theory of planned behavior, health belief model, health locus of control, social learning theory	3	1,3,4	1	African American	yes	prevention	1	qualitative interviews	no	Program satisfaction and fidelity		not reported	BMI or maintenance of healthy BMI	not reported	not reported
Lang, E.V., Berbaum, K.S., Pauker, S.G., Faintuch, S., Salazar, G.M., Lutgendorf, S., Laser, E., Logan, H., and Spiegel, D. 2008. Beneficial effects of hypnosis and adverse effects of empathic attention during percutaneous tumor treatment: When being nice	Downs	2009	Downs TJ, Ross L, Patton S, Rulnick S, Sinha D, Mucciarone D, et al. Complexities of holistic community-based participatory research for a low income, multi-ethnic population exposed to multiple built-environment stressors in Worcester, Massachusetts. Environ Res 2009 Nov;109(8):1028-40.	vulnerability theory, CBPR	4	4,5, 1,6	not reported	multi-ethnic and minority, not futher specified	no		4	mixed methods	no	not reported		Having several topic-based projects yielded useful information; but was hard to manage and articulate to the public; access to and engagement with the target population was very difficult. The project would have benefitted from having representative residents who were paid at the partners' tables. Engagement with residents and conflict burden varied highly across components.	environmental justice: trash removal, asthma risk factors	not reported	NEGATIVE PROCESS
Kroenke K, Theobald D, Wu J, Norton K, Morrison G, Carpenter J, Tu W. 2010 Effect of telecare management on pain and depression in patients with cancer: a randomized trial. JAMA 304(2):163-71.	Edgren	2005	Edgren KK, Parker EA, Israel BA, Lewis TC, Salinas MA, Robins TG, et al. Community involvement in the conduct of a health education intervention and research project: Community Action Against Asthma. Health Promot Pract 2005 Jul;6(3):263-9.	CBPR	3	5,1, 3	not reported	not specified; s.w. Detroit is predominantly Hispanic; eastside is predominantly African American	no	n/a	4	descriptive	no	not reported		not reported	1. Household intervention for asthma 2. Assessment of indoor and outdoor air quality effects on exacerbation of asthma in children. 3. Intervention using lung monitor and diary for asthmatic child/youth.	not reported	not reported
Lai, Y.H., Guo, S.L., Keefe, F.J., Tsai, S.L., Chien, C.C., Sung, Y.C., and Chen, M.L. 2004. Effects of brief pain educaion on hospitalized cancer patients with moderate to severe pain. Support Care Cancer, 12, 645-652.	Emmons	2005	Emmons KM, Stoddard AM, Fletcher R, Gutheil C, Suarez EG, Lobb R, et al. Cancer prevention among working class, multiethnic adults: results of the healthy directions-health centers study. Am J Public Health 2005 Jul;95(7):1200-5.	social contextual approach	3	1,4,2	0.38	black, non-hispanic other	yes	prevention	1	RCT	yes	efficiency		The incremental cost of the intervention was $168 per patient.	1-fruit and vegetable consumption 2-multivitamin intake 3-physical activity	Increases in fruit and vegetable consumption , vitamins, and less red meat consumption	POSITIVE PROCESS AND OUTCOME
deWit, R and vanDam, F. 2001. From hospital to home care: a randomized controlled trial of a pain education programme for cancer pateients with chronic pain. Journal of Advanced Nursing, 36, 742-754	Ferre	2010	Ferre CD, Jones L, Norris KC, Rowley DL. The Healthy African American Families (HAAF) project: from community-based participatory research to community-partnered participatory research. Ethn Dis 2010;20(1 Suppl 2):S2-S8.	CBPR	4	5, 4, 1, 2	1	african american	no	n/a	5	descriptive	no	Describes how communty partnered participatory research develops through phases.		not reported	Address multiple community health problems: preterm birth, HIV, asthma, depression, diabetes	not reported	not reported
Domar, A.D., Noe, J.N., Benson, H. 1987. The preoperative use of the relaxation response with ambulatory surgery patients. J Human Stress, 13, 101-107.	Fuller	2007	Fuller CM, Galea S, Caceres W, Blaney S, Sisco S, Vlahov D. Multilevel community-based intervention to increase access to sterile syringes among injection drug users through pharmacy sales in New York City. Am J Public Health 2007 Jan;97(1):117-24.	CBPR	3	1,2,5	0.96	black, hispanic, asian, other	no	n/a	5	quasi-experimental	yes	not reported		not reported	1. Among Harlem and South Bronx community members - intervention awareness and change perceptions toward IV drug use; 2. among pharmacists - changed attitudes and awareness about nonprescription syringe sales to IV Drug users 3. Among IV Drug users - injection practices	Increase in positive opinions and a decrease in negative opionions among individuals and pharmcists	POSITIVE OUTCOME
Gaston-Johansson, F., Fall-Dickson, J.M., etal. (2000).the effectivenes of the comprehensive coping strategy program on clinical outcomes in breast cancer autologous bone marrow transplantation. Cancer Nurs, 23, 277-85.	Grzywacz	2009	Grzywacz JG, Arcury TA, Marin A, Carrillo L, Coates ML, Quandt SA. Using lay health promoters in occupational health: outcome evaluation in a sample of Latino poultry-processing workers. New Solut 2009;19(4):449-66.	not reported	3	5,4,1	1	latino	no	n/a	5	post test only	no	not reported		not reported	1. recall of the intervention, 2. knowledge of occupational exposure to cumulative trauma disorder, knowledge of prevention of ctd's	Most participants could identify the primary occupational health exposure linked to CTDs, more than 50% of participants could recall one or more ways of preventing CTDs, and 43.3% described in detail recommended treatments. Nearly one-half reported an occupational health behavior change after hearing Maria’s Story.	POSITIVE OUTCOME
Given, B. A., C. W. Given, et al. (2005). "Effect of neutropenia on the impact of a cognitive-behavioral intervention for symptom management." Cancer 104(4): 869-78.	Heisler	2009	Heisler M, Spencer M, Forman J, Robinson C, Shultz C, Palmisano G, et al. Participants' assessments of the effects of a community health worker intervention on their diabetes self-management and interactions with healthcare providers. Am J Prev Med 2009 Dec;37(6S1):S270-S279.	social ecologic/CBPR guidance	3	1,5,2	50% african american; 50% latino	african american and latino	no	n/a	3	qualitative interviews	no	not reported		Participants reported that the program improved their ability to manage their diabetes by providing (1) clear and detailed information on diabetes and diabetes care; (2) education and training on specific strategies to meet diabetes care goals; (3) sustained and nonjudgmental assistance to increase their motivation and confidence; and (4) social and peer support that enabled them to better manage…	not reported	not reported	POSITIVE PROCESS
Goodwin, et al. 2001. The effect of group psychosocial support on survival in metastatic breast cancer. N Engl J Med, 345, 1719-26	Hiatt	2001	Hiatt RA, Pasick RJ, Stewart S, Bloom J, David P, Gardiner P, Luce J. Cancer Screening for Underserved Women: The Breast and Cervical Cancer Intervention Study. Cancer Epidemiol Biomarkers Prev 2008;17:1945-1949.	not specified	3	4,5,1	0.72	black, latina, chinese, Filipina, and other non-white minorities	yes	screening	1	quasi-experimental	yes	tracking of inreach and outreach components of the intervention; tracking of external context during the course of the intervention.		not reported	Self reported screening behavior; medical chart audits	Found no significant differences between intervention and control on mammography, Clinical Breast Exam, Pap smears.	INCON-CLUSIVE OUTCOME
Kalauokalani, D., Franks, P., Oliver, J.W., Meyers, F.J., and Kravitz, R.L. 2007. Can patient coaching reduce racial/ethnic disparities in cancer pain control? Secondary analysis of a randomized controlled trial. Pain Med, 8, 17-24.,	Jenkins	2010	Jenkins C, Pope C, Magwood G, Vandemark L, Thomas V, Hill K, et al. Expanding the chronic care framework to improve diabetes management: the REACH case study. Prog Community Health Partnersh 2010;4(1):65-79.	chronic care model	4	2,1,5,4	1	African Americans with diabetes	no	n/a	3	case study	no	effectiveness 1. sustain diabetes reduction activities; 2. establish two new health facilities in high need areas; 3. improved access and use of free medications, with derease in use of ER, and hospitalizations.	1	not reported	1. decrease amputations among African American men,	At the community level: (1) 2 local coalitions that obtained 501(c)3 designation that generates funds to sustain diabetes activities; (2) established 2 health facilities in high need areas; (3) improved access; (4) use of free medications (with significant decrease in ER services and hospitalizations for enrollees as compared to the year before enrollment). REACH community health workers and volu…	POSITIVE PROCESS AND OUTCOME
	Kelley	2005	Kelley MA, Baldyga W, Barajas F, Rodriguez-Sanchez M. Capturing change in a community--university partnership: Si Se Puede! Project. Prev Chronic Dis 2005 Apr;2(2):A22.	social ecological model	3	5,3,1	1	latino	no	n/a	3	case study	no	Documentation on community change was found in routine project reports, logs, the news media, meeting minutes, and community documents.		Although not a direct focus of the original research, substantial changes in community capacity were observed and measured over the course of the five-year project.	community capacity for health issues, family support for healthy lifestyle, self-efficacy for diabetes prevention and control and general health	not reported	POSITIVE PROCESS
	Margolis	2001	Margolis PA, Stevens R, Bordley WC, Stuart J, Harlan C, Keyes-Elstein L, et al. From concept to application: the impact of a community-wide intervention to improve the delivery of preventive services to children. Pediatrics 2001 Sep;108(3):E42.	not specified	4	5,4,3,1	85.2%	black	no	na	5	quasi-experimental	yes	Effectiveness	1	Policy-level changes at the state and community led to lasting changes in the organization and financing of care, which enabled changes in clinical services to take place. Researchers were also able to engage multiple practice organizations, reduce duplication, and improve the coordination of care. Changes in the process of preventive services delivery were noted in participating practices.	prenatal care and pregnancy outcomes	Intervention group women were significantly more likely than comparison group women to use contraceptives, not smoke tobacco, and have a safe and stimulating home environment for their children. Intervention group children were more likely to have had an appropriate number of well-child care visits and less likely to be injured. Intervention mothers also received Aid to Families with Dependent Ch…	POSITIVE PROCESS AND OUTCOME
	Nash	2006	Nash D, Azeez S, Vlahov D, Schori M. Evaluation of an intervention to increase screening colonoscopy in an urban public hospital setting. J Urban Health 2006 Mar;83(2):231-43.	not specified	3	4,1,2	85.5%	black, hispanic	yes	screening	1	obser-vational	yes	not reported		not reported	number receiving colonoscopy	The rate of screening colonoscopies increased	POSITIVE OUTCOME
	Parker	2008	Parker EA, Israel BA, Robins TG, Mentz G, Xihong L, Brakefield-Caldwell W, et al. Evaluation of Community Action Against Asthma: a community health worker intervention to improve children's asthma-related health by reducing household environmental triggers for asthma. Health Educ Behav 2008 Jun;35(3):376-95.	CBPR principles/empowerment/social cognitive	3	5,2,3	0.065	african american, hispanic	no	n/a	4	quasi-experimental	yes	not reported		not reported	Lung function, child's average asthma frequency, healthcare utilization,	The intervention was effective in increasing some of the measures of lung function (daily nadir Forced Expiratory Volume at one second and daily nadir Peak Flow), reducing the frequency of two symptoms (“cough that won’t go away,” “coughing with exercise”), reducing the proportion of children requiring unscheduled medical visits and reporting inadequate use of asthma controller medication, reduci…	POSITIVE OUTCOME
	Parker	2003	Parker EA, Israel BA, Williams M, Brakefield-Caldwell W, Lewis TC, Robins T, et al. Community action against asthma: examining the partnership process of a community-based participatory research project. J Gen Intern Med 2003 Jul;18(7):558-67.	CBPR	3	3,5,4	81% african american, 10% hispanic	african american, hispanic	no	n/a	4	qualitative interviews	no	Describes partnership CBPR implementation process: evaluation research: extent, quality, and fidelity of intervention evaluation.		Academic-community partnership accomplishments included: completion of a complex project, identification of children with previously undiagnosed asthma, and diverse participation in Steering Committee decisions.	decrease in asthma	not reported	POSITIVE PROCESS
	Plescia	2008	Plescia M, Groblewski M, Chavis L. A lay health advisor program to promote community capacity and change among change agents. Health Promot Pract 2008 Oct;9(4):434-9.	community empowerment	3	5,1, 2	1	african american	no	n/a	2,3	qualitative interviews	no	Change in community capacity and change in the change agents: survey, focus groups, guided discussions		Lay health advisors reported that they internalized their role as a community advocates and have made positive changes in their own personal health behavior. They also reported that their understanding of the underlying causes of poor health had expanded to include social and institutional factors and they reported beginning to shift their emphasis toward advocacy for social and institutional cha…	Decrease in cardiovascular disease and diabetes	not reported	POSITIVE PROCESS
	Rosamond	2000	Rosamond WD, Ammerman AS, Holliday JL, Tawney KW, Hunt KJ, Keyserling TC, et al. Cardiovascular disease risk factor intervention in low-income women: the North Carolina WISEWOMAN project. Prev Med 2000 Oct;31(4):370-9.	not specified	3	4,2,1	0.361	african american, other	no	n/a	2	RCT	yes	not reported		not reported	Change in blood pressure, total cholesterol, number of servings of fruits and vegetables, level of moderate or vigorous physical activity, blood pressure, BMI, weight, CHD risk score, smoking behavior, lipid lowering medication	Changes in total cholesterol levels, HDL-C levels, diastolic blood pressure, and BMI were observed but were not significantly different from the control group. A dietary score that summarized fat and cholesterol intake improved in the intervention group, compared with essentially no change in the control group.	POSITIVE OUTCOME
	Schensul	2009	Schensul JJ, Radda K, Coman E, Vazquez E. Multi-level intervention to prevent influenza infections in older low income and minority adults. Am J Community Psychol 2009 Jun;43(3-4):313-29.	individual empowerment/ ecologic model	3	1,5,6	0.89	Puerto Rican/other Latino African American West Indian	No	n/a	5	RCT	yes	effectiveness patient-centeredness	1	1- Collaborating Agencies - Unsolicited volunteer efforts; showing vaccine film independently; inviting VIP members to speak to planning bodies and other public venues; advocating for more vaccinations in building and neighborhood sites 2- Building Management - Documented independent encouragement of flu campaign activities in building 3- V.I.P. Committee - Development of group identity; successf…	Primary = Current Vaccination Status Secondary = Vaccination Self-Efficacy Secondary = Health Beliefs related to vaccination	1. Increase in vaccination rates improved pro-vaccination; 2. Knowledge, beliefs, perceived norms changed toward vaccination and increased self-efficacy.	POSITIVE PROCESS AND OUTCOME
	Stoddard	2004	Stoddard AM, Palombo R, Troped PJ, Sorensen G, Will JC. Cardiovascular disease risk reduction: the Massachusetts WISEWOMAN project. J Womens Health (Larchmt ) 2004 Jun;13(5):539-46.	not specified	3	3,1, 5	20.6%	black, hispanic, other/unknown	no	n/a	2	RCT	yes	not reported		not reported	Change in blood pressure, total cholesterol, number of servings of fruits and vegetables, level of moderate or vigorous physical activity	The intervention significantly lowered the overall prevalence of hypertension. A significantly greater percentage of women became physically active at the intervention sites compared to the control sites.	POSITIVE OUTCOME
	Wynn	2011	Wynn TA, Taylor-Jones MM, Johnson RE, Bostick PB, Fouad M. Using community-based participatory approaches to mobilize communities for policy change. Fam Community Health 2011 Jan;34 Suppl 1:S102-S114.	CBPR	5	1,4,5,6,3	not specified	not specified: among Alabama's most vulnerable African American communities	yes	prevention	1	case study	no	not reported		Documeted the steps taken by this empowered coalition to mobilize their community to impact cancer disparities using CBPR to change tobacco, breast and cervical cancer legislation.	Passing a smokefree law (not passed), challenge amendments to local ordinances that would weaken it; passage of House Bill 147 expanding coverage of breast and cervical cancer screening coverage under Medicaid.	(1) Legilsature came closest to passing a smoke-free law in 2008. Local city council prepared to challenge amendments that would weaken their current smoking ordiance. (2) As an outcome of the state-wide mobiliization process, the governor signed Bill 147, expanding the treatment for women diagnosed with breast and/or cervical cancer through Medicaid, effective 7/1/2009. Post legislation, 79.2% i…	POSITIVE OUTCOME
	a Types of Levels:1=individual, 2=provider/counselor/interaction, 3=team/group/family, 4=organization/health system, 5=community/neighborhoods/community health /community worker,6=policy/environment. The Ccmmunity Health Worker (CHW)/Lay Health Worker (LHW), Navigator is coded as community or organizational level, depending on the workers' role in the intervention, recruitment sources, training, …
	b Cancer continuum: prevention, screening/diagnosis, treatment, survivorship, end-of-life care
	c Processes of implementation includes: extent, fidelity and/or quality; Processes using IOM criteria are: safety, effectiveness, patient-centeredness, timeliness, efficiency
				three	21
				four	4
				five
				six

## Sheet: Intervention
Article Name							Control (n at baseline)	Control N	Intervention (n at baseline)	Intervention N	Intervention Format & Mode	Target of the intervention (level)	Type of Provider	rx sessions	# of Treatment Sessions	Retention (%)	ret.	Findings on Process(es)	Findings on Primary Outcome(s)
Allard, N. 2006. Day surgery and recovery in women with a suspicious breast lesion: evaluation of a psychoeducational nursing intervetnion. Can Oncol Nurs J, 16, 137-53.
Anderson, K.O., et al. 2004. Pain education for underserved minority cancer patients: a randomized controlled trial. J Clin Oncol, 22, 4918-4925.
Arathuzik, D. 1994. Effects of cognitive-behavioral stratgies on pain in cancer patients. Cancer Nurs, 17, 207-214.
Bozcuk H, Kolagasi O, Samur M, et al. A brief information sheet on opioid effects improves quality of life in cancer patients on opioids. Internet Journal of Pain, Symptom Control & Palliative Care. 2004;2(2):12p
Chang, M.C., Chang, Y.C., Chiou, J.F., Tsou, T.S. & Liln, C.C. 2002. Overcoming patient-related barriers to cancer pain management for home care patients. Cancer Nurs, 25, 470-476
Changrani J, Lieberman M, Golant M, Rios P, Damman J, Gany F. Online cancer support groups: Experiences with underserved immigrant Latinos. Primary Psychiatry. Oct 2008;15(10):55-62.
Dalton, J.A., Keefe, F.J., Carlson, J., & Youngblood R. (2004). Tailoring cognitive-behavioral treatment for cancer pain. Pain Manag Nurs, 5, 3-18
deWit, R and vanDam, F. 2001. From hospital to home care: a randomized controlled trial of a pain education programme for cancer pateients with chronic pain. Journal of Advanced Nursing, 36, 742-754
deWit, R., vanDam, F., Loonstra, S., Zandbelt, L., vanBuuren, A., van der Heijden, K., Leenhouts, G., Duivenvoorden, H., and Abu-Saad, H.H. 2002. Improving the quality of pain treatment by a tailored pain education programme for cancer pateints in chronic
Domar, A.D., Noe, J.N., Benson, H. 1987. The preoperative use of the relaxation response with ambulatory surgery patients. J Human Stress, 13, 101-107.
Ferrell, B.R., etal. 1993. Development and implementation of a pain education program. Cancer, 72, 426-432.
Goodwin, et al. 2001. The effect of group psychosocial support on survival in metastatic breast cancer. N Engl J Med, 345, 1719-26
Keefe, F.J., Ahles, T.A., Sutton, L., Dalton, J.A., Baucom, D., Pope, M.S., Knowles, V., McKinstry, E., Furstenberg, C., Syrjala, K., Waters, S.J., McKee, D., McBride, C., Rumble, M., and Scipio, C. 2005. Partner-guided cancer pain management at the end o
Kalauokalani, D., Franks, P., Oliver, J.W., Meyers, F.J., and Kravitz, R.L. 2007. Can patient coaching reduce racial/ethnic disparities in cancer pain control? Secondary analysis of a randomized controlled trial. Pain Med, 8, 17-24.,
Kroenke K, Theobald D, Wu J, Norton K, Morrison G, Carpenter J, Tu W. 2010 Effect of telecare management on pain and depression in patients with cancer: a randomized trial. JAMA 304(2):163-71.
Kwekkeboom, K. L. (2003). "Music versus distraction for procedural pain and anxiety in patients with cancer." Oncol Nurs Forum 30(3): 433-40.
Lai, Y.H., Guo, S.L., Keefe, F.J., Tsai, S.L., Chien, C.C., Sung, Y.C., and Chen, M.L. 2004. Effects of brief pain educaion on hospitalized cancer patients with moderate to severe pain. Support Care Cancer, 12, 645-652.
Lang, E.V., Berbaum, K.S., Pauker, S.G., Faintuch, S., Salazar, G.M., Lutgendorf, S., Laser, E., Logan, H., and Spiegel, D. 2008. Beneficial effects of hypnosis and adverse effects of empathic attention during percutaneous tumor treatment: When being nice
Lin, C.C., Chou, P.L., Wu, S.L., Chang, Y.C., and Lai, Y.L. 2006. Long-term effectiveness of a patient and family pain education program on overcoming barriers to management of cancer pain. Pain, 122, 271-281.
Miaskowski, C., M. Dodd, et al. (2004). "Randomized clinical trial of the effectiveness of a self-care intervention to improve cancer pain management." J Clin Oncol 22(9): 1713-20.
Montgomery, G.H., Bovbjerg, D.H., Schnur, J.B., Daniel, D., Goldfarb, A., Weitz, C.R., Schechter, C., Graff-Zivin, J., Tatrow, K., Price, D. D., and Silverstein, J.H. 2007. a randomized clinical trial of a brief hypnosis inervention to control side effect
Montgomery GH, Weltz CR, Seltz M, Bovbjerg DH. (2002). Brief presurgery hypnosis erduces distress and pain in excisional breast biopsy patients. International Journal of Clinical and Experimental Hypnosis, 50, 17-32.
Oliver, J.W., etal. 2001. Individualized patient education and coaching to improve pain control among cancer outpatients. Journal of Clinical Oncology, 19, 2206-2212.
Rimer, B., etal. 1987. Enhancing cancer pain control regimens through patient education. Patient Education and Counseling, 10, 267-277.
Sloman, R. 1994. The use of relaxation for the promotion of comfort and pain relief in persons with advanced cancer. Contemp Nurse, 3, 6-12.
Spiegel D., Bloom J.R. 1983. Group therapy and hypnosis reduce metastatic breast carcinoma pain, Psychosom Med, 45, 333-339
Syrjala, K. L., C. Cummings, et al. (1992). "Hypnosis or cognitive behavioral training for the reduction of pain and nausea during cancer treatment: a controlled clinical trial." Pain 48(2): 137-46.
Syrjala, K.; Abrams, J.; Polissar, N.; Hansberry, J.; Robison, J.; DuPen, S.;Stillman, M.; et al (2008). Patient training in cancer pain management using integrated print and video materials: A multisite randomized controlled trial. Pain, 135, 175-186.
Tsai P.S, Chen P.L, et al. (2007). "Effects of electromyography biofeedback-assisted relaxation on pain in patients with advanced cancer in a palliative care unit." Cancer Nursing 30(5): 347-353.
Vallieres, I., et al. 2006. Effectiveness of a clinical intervention in improving pain control in outpatients with cancer treated by radiation therapy. Int J Radia Oncol Biol Phys, 66, 234-237.
Ward, S., H. S. Donovan, et al. (2000). "An individualized intervention to overcome patient-related barriers to pain management in women with gynecologic cancers." Res Nurs Health 23(5): 393-405.
Ward, S., Donovan, H., Gunnarsdottir, S., Serlin, R.C., Shapiro, G.R., Hughes, S. 2008. A randomized trial of a representational intervention to decrease cancer pain (RIDcancerPain). Health Psychol, 27, 59-67.	Heisler	2009	Heisler M, Spencer M, Forman J, Robinson C, Shultz C, Palmisano G, et al. Participants' assessments of the effects of a community health worker intervention on their diabetes self-management and interactions with healthcare providers. Am J Prev Med 2009 Dec;37(6S1):S270-S279.	X	no	no
Wilkie, D.J., Williams, A.R., Grevstad, P., and Medwa, J. 1995, Coaching persons with lung cancer to report sensory pain. Cancer Nurs, 18, 7-15	Holmes	2008	Holmes JH, Lehman A, Hade E, Ferketich AK, Gehlert S, Rauscher GH, et al. Challenges for multilevel health disparities research in a transdisciplinary environment. Am J Prev Med 2008 Aug;35(2 Suppl):S182-S192.	X	no	no
Yates, P., Edwards, H., Nash, R., Aranda, S., Purdie, D., Najman, J., Skerman, H., and Walsh, A. 2004. A randomized controlled trial of a nurse-administered educational intervention for improving cancer pain management in ambulatory settings. Patient Educ	Horowitz	2008	Horowitz CR, Goldfinger JZ, Muller SE, Pulichino RS, Vance TL, Arniella G, et al. A model for using community-based participatory research to address the diabetes epidemic in East Harlem. Mt Sinai J Med 2008 Jan;75(1):13-21.	X	no	no
	Hull	2010	Hull PC, Canedo JR, Reece MC, Lira I, Reyes F, Garcia E, et al. Using a participatory research process to address disproportionate Hispanic cancer burden. J Health Care Poor Underserved 2010 Feb;21(1S):95-113.	X	no	no
	Jenkins	2010	Jenkins C, Pope C, Magwood G, Vandemark L, Thomas V, Hill K, et al. Expanding the chronic care framework to improve diabetes management: the REACH case study. Prog Community Health Partnersh 2010;4(1):65-79.	X	no	no
	Johnson	2009	Johnson CE, Ali SA, Shipp MP. Building community-based participatory research partnerships with a Somali refugee community. Am J Prev Med 2009 Dec;37(6 Suppl 1):S230-S236.	X	no	no
	Jones	2010	Jones L, Wright K, Wright A, Brown ND, Broussard M, Hogan V. The Healthy African American Families' risk communications initiative: using community partnered participatory research to address preterm birth at the local level. Ethn Dis 2010;20(1 Suppl 2):S2-S5.	X	no	no
	Kelley	2005	Kelley MA, Baldyga W, Barajas F, Rodriguez-Sanchez M. Capturing change in a community--university partnership: Si Se Puede! Project. Prev Chronic Dis 2005 Apr;2(2):A22.	X	no	no
	Keyserling	2008	Keyserling TC, Samuel Hodge CD, Jilcott SB, Johnston LF, Garcia BA, Gizlice Z, et al. Randomized trial of a clinic-based, community-supported, lifestyle intervention to improve physical activity and diet: the North Carolina enhanced WISEWOMAN project. Prev Med 2008 Jun;46(6):499-510.	X	Yes	Yes
	Kobetz	2010	Kobetz E, Mendoza AD, Barton B, Menard J, Allen G, Pierre L, et al. Mammography use among Haitian women in Miami, Florida: an opportunity for intervention. J Immigr Minor Health 2010 Jun;12(3):418-21.	X	no	no
	Kristofco	2007	Kristofco RE, Lorenzi NM. How quality improvement interventions can address disparities in depression. J Contin Educ Health Prof 2007;27 Suppl 1:S33-S39.	X	no	no
	Martinez	2009	Martinez SM, Arredondo EM, Perez G, Baquero B. Individual, social, and environmental barriers to and facilitators of physical activity among Latinas living in San Diego County: focus group results. Fam Community Health 2009 Jan;32(1):22-33.	X	no	no
	Murray	2010	Murray DM, Pennell M, Rhoda D, Hade EM, Paskett ED. Designing studies that would address the multilayered nature of health care. J Natl Cancer Inst Monogr 2010;2010(40):90-6.	X	no	no
	Narva	2009	Narva AS. Optimal preparation for ESRD. Clin J Am Soc Nephrol 2009 Dec;4 Suppl 1:S110-S113.	X	no	no
	Parker	2003	Parker EA, Israel BA, Williams M, Brakefield-Caldwell W, Lewis TC, Robins T, et al. Community action against asthma: examining the partnership process of a community-based participatory research project. J Gen Intern Med 2003 Jul;18(7):558-67.	X	No	No
	Plescia	2008	Plescia M, Groblewski M, Chavis L. A lay health advisor program to promote community capacity and change among change agents. Health Promot Pract 2008 Oct;9(4):434-9.	X	no	no
	Scarinci	2009	Scarinci IC, Johnson RE, Hardy C, Marron J, Partridge EE. Planning and implementation of a participatory evaluation strategy: a viable approach in the evaluation of community-based participatory programs addressing cancer disparities. Eval Program Plann 2009 Aug;32(3):221-8.	X	no	no
	Schensul	2003	Schensul JJ, Levy JA, Disch WB. Individual, contextual, and social network factors affecting exposure to HIV/AIDS risk among older residents living in low-income senior housing complexes. J Acquir Immune Defic Syndr 2003 Jun 1;33(S2):S138-S152.	X	no	no
	Sorensen	2003	Sorensen G, Emmons K, Hunt MK, Barbeau E, Goldman R, Peterson K, et al. Model for incorporating social context in health behavior interventions: applications for cancer prevention for working-class, multiethnic populations. Prev Med 2003 Sep;37(3):188-97.	X	no	no
	Storck	2009	Storck M, Beal T, Bacon JG, Olsen P. Behavioral and mental health challenges for indigenous youth: research and clinical perspectives for primary care. Pediatr Clin North Am 2009 Dec;56(6):1461-79.	X	no	no
	Story	2010	Story L, Hinton A, Wyatt SB. The role of community health advisors in community-based participatory research. Nurs Ethics 2010 Jan;17(1):117-26.	X	no	no
	Strickland	2006	Strickland CJ. Challenges in community-based participatory research implementation: experiences in cancer prevention with Pacific Northwest American Indian tribes. Cancer Control 2006 Jul;13(3):230-6.	X	no	no
	Tanjasiri	2007	Tanjasiri SP, Tran JH, Palmer PH, Foo MA, Hanneman M, Lee C, et al. Developing a community-based collaboration to reduce cancer health disparities among Pacific Islanders in California. Pac Health Dialog 2007 Mar;14(1):119-27.	X	no	no
	Warnecke	2008	Warnecke RB, Oh A, Breen N, Gehlert S, Paskett E, Tucker KL, et al. Approaching health disparities from a population perspective: the National Institutes of Health Centers for Population Health and Health Disparities. Am J Public Health 2008 Sep;98(9):1608-15.	X	no	no
	Wynn	2011	Wynn TA, Taylor-Jones MM, Johnson RE, Bostick PB, Fouad M. Using community-based participatory approaches to mobilize communities for policy change. Fam Community Health 2011 Jan;34 Suppl 1:S102-S114.	X	no	no
	Wynn	2011	Wynn TA, Anderson-Lewis C, Johnson R, Hardy C, Hardin G, Walker S, et al. Developing a community action plan to eliminate cancer disparities: lessons learned. Prog Community Health Partnersh 2011;5(2):161-8.		no	no
	Yancey	2004	Yancey AK. Building capacity to prevent and control chronic disease in underserved communities: expanding the wisdom of WISEWOMAN in intervening at the environmental level. J Womens Health (Larchmt ) 2004 Jun;13(5):644-9.	X	no	no
	Andrews	2007	Andrews JO, Bentley G, Crawford S, Pretlow L, Tingen MS. Using community-based participatory research to develop a culturally sensitive smoking cessation intervention with public housing neighborhoods. Ethn Dis 2007;17(2):331-7.	X	Yes
	Beresford	2010	Beresford SA, Bishop SK, Brunner NL, Duncan GE, McGregor BA, McLerran DF, et al. Environmental assessment at worksites after a multilevel intervention to promote activity and changes in eating: the PACE project. J Occup Environ Med 2010 Jan;52(S1):S22-S28.	X	Yes
	Berg	2009	Berg M, Coman E, Schensul JJ. Youth Action Research for Prevention: a multi-level intervention designed to increase efficacy and empowerment among urban youth. Am J Community Psychol 2009 Jun;43(3-4):345-59.	X	Yes
	Campbell	2007	Campbell MK, Resnicow K, Carr C, Wang T, Williams A. Process evaluation of an effective church-based diet intervention: Body & Soul. Health Educ Behav 2007 Dec;34(6):864-80.	X	Yes but in Resnicow 04
	Chen	2008	Chen LA, Santos S, Jandorf L, Christie J, Castillo A, Winkel G, et al. A program to enhance completion of screening colonoscopy among urban minorities. Clin Gastroenterol Hepatol 2008 Apr;6(4):443-50.	X	Yes but no control
	Chin	2007	Chin MH, Drum ML, Guillen M, Rimington A, Levie JR, Kirchhoff AC, et al. Improving and sustaining diabetes care in community health centers with the health disparities collaboratives. Med Care 2007 Dec;45(12):1135-43.	X	Yes
	Davis	2011	Davis DS, Goldmon MV, Coker-Appiah DS. Using a Community-Based Participatory Research Approach to Develop a Faith-Based Obesity Intervention for African American Children. Health Promot Pract 2011 May 3.	X	No
	Dennison	2007	Dennison CR, Post WS, Kim MT, Bone LR, Cohen D, Blumenthal RS, et al. Underserved urban african american men: hypertension trial outcomes and mortality during 5 years. Am J Hypertens 2007 Feb;20(2):164-71.	X	Yes
	Emmons	2005	Emmons KM, Stoddard AM, Fletcher R, Gutheil C, Suarez EG, Lobb R, et al. Cancer prevention among working class, multiethnic adults: results of the healthy directions-health centers study. Am J Public Health 2005 Jul;95(7):1200-5.	X	Yes
	Emmons	2003	Emmons KM, Stoddard AM, Gutheil C, Suarez EG, Lobb R, Fletcher R. Cancer prevention for working class, multi-ethnic populations through health centers: the healthy directions study. Cancer Causes Control 2003 Oct;14(8):727-37.	X	No
	Fuller	2007	Fuller CM, Galea S, Caceres W, Blaney S, Sisco S, Vlahov D. Multilevel community-based intervention to increase access to sterile syringes among injection drug users through pharmacy sales in New York City. Am J Public Health 2007 Jan;97(1):117-24.	X	Yes
	Gentile	2009	Gentile, DA, Welk, G, Eisenmann, JC, Reimer, RA, Walsh, DA, Russell, DW, Callahan, R, Walsh, M, Strickland, S, and Fritz, K., Evaluation of a multiple ecological level child obesity prevention program: Switch what you Do, View, and Chew, BMC Medicine 2009; 7: 49	x	yes
	Goldmon	2008	Goldmon M, Roberson JT, Carey T, Godley P, Howard DL, Boyd C, et al. The data collection/data distribution center: building a sustainable African-American church-based research network. Prog Community Health Partnersh 2008;2(3):205-24.
	Hiatt	2001	Hiatt RA, Pasick RJ, Stewart S, Bloom J, Davis P, Gardiner P, et al. Community-based cancer screening for underserved women: design and baseline findings from the Breast and Cervical Cancer Intervention Study. Prev Med 2001 Sep;33(3):190-203.	X	Yes baseline only. Need results paper
	Jilcott	2006	Jilcott SB, Keyserling TC, Samuel-Hodge CD, Rosamond W, Garcia B, Will JC, et al. Linking clinical care to community resources for cardiovascular disease prevention: the North Carolina Enhanced WISEWOMAN project. J Womens Health (Larchmt ) 2006 Jun;15(5):569-83.	X	Yes see Keyserling for results
	Keyserling	2008	Keyserling TC, Samuel Hodge CD, Jilcott SB, Johnston LF, Garcia BA, Gizlice Z, et al. Randomized trial of a clinic-based, community-supported, lifestyle intervention to improve physical activity and diet: the North Carolina enhanced WISEWOMAN project. Prev Med 2008 Jun;46(6):499-510.	X	Yes
	Lasser	2009	Lasser KE, Murillo J, Medlin E, Lisboa S, Valley-Shah L, Fletcher RH, et al. A multilevel intervention to promote colorectal cancer screening among community health center patients: results of a pilot study. BMC Fam Pract 2009;10:37.	X	yes
	Margolis	2001	Margolis PA, Stevens R, Bordley WC, Stuart J, Harlan C, Keyes-Elstein L, et al. From concept to application: the impact of a community-wide intervention to improve the delivery of preventive services to children. Pediatrics 2001 Sep;108(3):E42.	X	yes
	Nash	2006	Nash D, Azeez S, Vlahov D, Schori M. Evaluation of an intervention to increase screening colonoscopy in an urban public hospital setting. J Urban Health 2006 Mar;83(2):231-43.	X	yes
	Ogedegbe	2009	Ogedegbe G, Tobin JN, Fernandez S, Gerin W, Diaz-Gloster M, Cassells A, et al. Counseling African Americans to Control Hypertension (CAATCH) trial: a multi-level intervention to improve blood pressure control in hypertensive blacks. Circ Cardiovasc Qual Outcomes 2009 May;2(3):249-56.	X	no
	Parker	2008	Parker EA, Israel BA, Robins TG, Mentz G, Xihong L, Brakefield-Caldwell W, et al. Evaluation of Community Action Against Asthma: a community health worker intervention to improve children's asthma-related health by reducing household environmental triggers for asthma. Health Educ Behav 2008 Jun;35(3):376-95.	X	Yes
	Paskett	2002	Paskett ED, Cooper MR, Stark N, Ricketts TC, Tropman S, Hatzell T, et al. Clinical trial enrollment of rural patients with cancer. Cancer Pract 2002 Jan;10(1):28-35.	X	yes
	Rosamond	2000	Rosamond WD, Ammerman AS, Holliday JL, Tawney KW, Hunt KJ, Keyserling TC, et al. Cardiovascular disease risk factor intervention in low-income women: the North Carolina WISEWOMAN project. Prev Med 2000 Oct;31(4):370-9.	X	yes
	Schensul	2009	Schensul JJ, Radda K, Coman E, Vazquez E. Multi-level intervention to prevent influenza infections in older low income and minority adults. Am J Community Psychol 2009 Jun;43(3-4):313-29.	X	yes
	Sorensen	2007	Sorensen G, Stoddard AM, Dubowitz T, Barbeau EM, Bigby J, Emmons KM, et al. The influence of social context on changes in fruit and vegetable consumption: results of the healthy directions studies. Am J Public Health 2007 Jul;97(7):1216-27.	X named: Emmons0971216	Yes
	Staten	2004	Staten, LK, Gregory-Mercado, KY, Ranger-Moore, J, Will, JC, Giuliano, AR, Ford, ES, and Marshall, J. Provider Counseling, Health Education and Community Health Workers: The Arizona WISEWOMAN project, Journal of Women's Health, 13(5) 547-556.	x	No
	Stoddard	2004	Stoddard AM, Palombo R, Troped PJ, Sorensen G, Will JC. Cardiovascular disease risk reduction: the Massachusetts WISEWOMAN project. J Womens Health (Larchmt ) 2004 Jun;13(5):539-46.	X	yes
	Taplin	2008	Taplin SH, Haggstrom D, Jacobs T, Determan A, Granger J, Montalvo W, et al. Implementing colorectal cancer screening in community health centers: addressing cancer health disparities through a regional cancer collaborative. Med Care 2008 Sep;46(9S1):S74-S83.	X	pre-post only
	Valente	2010	Valente TW, Fujimoto K, Palmer P, Tanjasiri SP. A network assessment of community-based participatory research: linking communities and universities to reduce cancer disparities. Am J Public Health 2010 Jul;100(7):1319-25.	X	no
