# Supplementary material for: Multilevel Interventions and Racial/Ethnic Health Disparities
Source: Oxford University Press journal article supplement (doi:10.1093/jncimonographs/lgs015), 2012-05-01
Supplement: lgs015_Supplementary_Data.zip [file lgs015_Supplementary_Data.zip › jnci-JNCI-11-1568-s03.xlsx]

## Sheet: Descriptives
	Appendix 3. Description of the study interventions (N=26)
Article Name	Author	Year	Full reference	Control (N at baseline)	Control Condition	Intervention (N at baseline)	Retention (%)	Type of Provider	Type of Intervention	No. of Treatment Sessions
deWit, R, van Dam, F., Zandbelt, L., van Buuren, A., van der Heijden, K., Leenohouts, G., & Loonstra, S. 1997. A pain education progream for chronic ancer pain patients: follow-up results from a randomized controlled trial. Pain, 73, 55-69.	Allicock	2010	Allicock M, Campbell MK, Valle CG, Barlow JN, Carr C, Meier A, et al. Evaluating the implementation of peer counseling in a church-based dietary intervention for African Americans. Patient Educ Couns 2010 Oct;81(1):37-42.	not reported	no intervention	464	not reported	peer counselor	Peer counseling	most frequently 1-2
Dalton, J.A., Keefe, F.J., Carlson, J., & Youngblood R. (2004). Tailoring cognitive-behavioral treatment for cancer pain. Pain Manag Nurs, 5, 3-18	Balcazar	2009	Balcazar H, Rosenthal L, De HH, Aguirre M, Flores L, Vasquez E, et al. Use of community-based participatory research to disseminate baseline results from a cardiovascular disease randomized community trial for Mexican Americans living in a U.S.-Mexico border community. Educ Health (Abingdon ) 2009 Dec;22(3):279.	136	health education materials	192	87	community health worker	Educational sessions with a community health worker	not reported
Kwekkeboom, K. L. (2003). "Music versus distraction for procedural pain and anxiety in patients with cancer." Oncol Nurs Forum 30(3): 433-40.	Beresford	2010	Beresford SA, Bishop SK, Brunner NL, Duncan GE, McGregor BA, McLerran DF, et al. Environmental assessment at worksites after a multilevel intervention to promote activity and changes in eating: the PACE project. J Occup Environ Med 2010 Jan;52(S1):S22-S28.	33	no intervention	33	not reported	employee peers	Employer-based health programming	programs, not sessions
Kwekkeboom, K.L., Wanta, B., and Bumpus, M. 2008. Individual difference variables and the effects of progressive muscle relaxation and analgesic imagery interventions on cancer pain. J Pain Symptom Manage, 36, 604-615.	Berg	2009	Berg M, Coman E, Schensul JJ. Youth Action Research for Prevention: a multi-level intervention designed to increase efficacy and empowerment among urban youth. Am J Community Psychol 2009 Jun;43(3-4):345-59.	202	summer youth employement programs	114	82.6	prevention research educators	Youth training	not reported - a summer training program for youth
Bozcuk H, Kolagasi O, Samur M, et al. A brief information sheet on opioid effects improves quality of life in cancer patients on opioids. Internet Journal of Pain, Symptom Control & Palliative Care. 2004;2(2):12p	Chin	2007	Chin MH, Drum ML, Guillen M, Rimington A, Levie JR, Kirchhoff AC, et al. Improving and sustaining diabetes care in community health centers with the health disparities collaboratives. Med Care 2007 Dec;45(12):1135-43.	1168	clinic continuous quality improvement along chronic care model	1249	82% for centers	Institute for Healthcare Improvement provided Center trainings	Learning sessions, provider training, and patient materials	4 provider training sessions plus 16 calls
Dalton, JA. (1987). Educaztion for pain management: A pilot study. Patient Eduation and Counseling, 9, 155-165.	Corbie-Smith	2011	Corbie-Smith G, Adimora AA, Youmans S, Muhammad M, Blumenthal C, Ellison A, et al. Project GRACE: a staged approach to development of a community-academic partnership to address HIV in rural African American communities. Health Promot Pract 2011 Mar;12(2):293-302.	not reported	not reported	not reported	not reported	VISIONS, consulting company	Training workshops	4-day workshop
	Davis	2011	Davis DS, Goldmon MV, Coker-Appiah DS. Using a Community-Based Participatory Research Approach to Develop a Faith-Based Obesity Intervention for African American Children. Health Promot Pract 2011 May 3.	not reported	not reported	not reported	not reported	researcher	Partnership and intervention planning and development	not reported
Lang, E.V., Berbaum, K.S., Pauker, S.G., Faintuch, S., Salazar, G.M., Lutgendorf, S., Laser, E., Logan, H., and Spiegel, D. 2008. Beneficial effects of hypnosis and adverse effects of empathic attention during percutaneous tumor treatment: When being nice	Downs	2009	Downs TJ, Ross L, Patton S, Rulnick S, Sinha D, Mucciarone D, et al. Complexities of holistic community-based participatory research for a low income, multi-ethnic population exposed to multiple built-environment stressors in Worcester, Massachusetts. Environ Res 2009 Nov;109(8):1028-40.	not reported	not reported	not reported	not reported	not reported	Intervention planning, development, and implementation (through a research-focused/action-oriented approach)	not reported
Kroenke K, Theobald D, Wu J, Norton K, Morrison G, Carpenter J, Tu W. 2010 Effect of telecare management on pain and depression in patients with cancer: a randomized trial. JAMA 304(2):163-71.	Edgren	2005	Edgren KK, Parker EA, Israel BA, Lewis TC, Salinas MA, Robins TG, et al. Community involvement in the conduct of a health education intervention and research project: Community Action Against Asthma. Health Promot Pract 2005 Jul;6(3):263-9.	not reported	not reported	not reported	not reported	not reported	Building community capacity, particularly among community partners and community health workers	not reported
deWit, R and vanDam, F. 2001. From hospital to home care: a randomized controlled trial of a pain education programme for cancer pateients with chronic pain. Journal of Advanced Nursing, 36, 742-754	Emmons	2005	Emmons KM, Stoddard AM, Fletcher R, Gutheil C, Suarez EG, Lobb R, et al. Cancer prevention among working class, multiethnic adults: results of the healthy directions-health centers study. Am J Public Health 2005 Jul;95(7):1200-5.	1131	usual care	1088	88	physician and health advisor	In-person counseling session with health advisor and 4 calls, physician advice, tailored materials.	not reported
Domar, A.D., Noe, J.N., Benson, H. 1987. The preoperative use of the relaxation response with ambulatory surgery patients. J Human Stress, 13, 101-107.	Ferre	2010	Ferre CD, Jones L, Norris KC, Rowley DL. The Healthy African American Families (HAAF) project: from community-based participatory research to community-partnered participatory research. Ethn Dis 2010;20(1 Suppl 2):S2-S8.	not reported	not reported	not reported	not reported	not reported	Capacity building, partnership to broker research and health promotion activities within its community.	not reported
Rimer, B., etal. 1987. Enhancing cancer pain control regimens through patient education. Patient Education and Counseling, 10, 267-277.	Fuller	2007	Fuller CM, Galea S, Caceres W, Blaney S, Sisco S, Vlahov D. Multilevel community-based intervention to increase access to sterile syringes among injection drug users through pharmacy sales in New York City. Am J Public Health 2007 Jan;97(1):117-24.	249	no intervention	505	not reported	IDU-servicing communitybased organizations	Training programs, health fairs, educational materials	not reported
Given, B. A., C. W. Given, et al. (2005). "Effect of neutropenia on the impact of a cognitive-behavioral intervention for symptom management." Cancer 104(4): 869-78.	Grzywacz	2009	Grzywacz JG, Arcury TA, Marin A, Carrillo L, Coates ML, Quandt SA. Using lay health promoters in occupational health: outcome evaluation in a sample of Latino poultry-processing workers. New Solut 2009;19(4):449-66.	not reported	not reported	30: only descriptive	not reported	lay health provider	Lay health worker presented educational story to individuals	1
Goodwin, et al. 2001. The effect of group psychosocial support on survival in metastatic breast cancer. N Engl J Med, 345, 1719-26	Heisler	2009	Heisler M, Spencer M, Forman J, Robinson C, Shultz C, Palmisano G, et al. Participants' assessments of the effects of a community health worker intervention on their diabetes self-management and interactions with healthcare providers. Am J Prev Med 2009 Dec;37(6S1):S270-S279.	not reported	not reported	40 interviews	not reported	not reported	Training through group self-management sessions and one-to-one support.	not reported
Kalauokalani, D., Franks, P., Oliver, J.W., Meyers, F.J., and Kravitz, R.L. 2007. Can patient coaching reduce racial/ethnic disparities in cancer pain control? Secondary analysis of a randomized controlled trial. Pain Med, 8, 17-24.,	Hiatt	2001	Hiatt RA, Pasick RJ, Stewart S, Bloom J, David P, Gardiner P, Luce J. Cancer Screening for Underserved Women: The Breast and Cervical Cancer Intervention Study. Cancer Epidemiol Biomarkers Prev 2008;17:1945-1949.	798	usual care	801	not reported	lay worker, medical providers, patient navigator	Three screening-related interventions; (1) community-based lay worker outreach; (2) clinic-based provider training and reminder system; (3) patient navigator for followup of abnormal screening results.	mean number of intervention (outreach) attended: 0.85
	Jenkins	2010	Jenkins C, Pope C, Magwood G, Vandemark L, Thomas V, Hill K, et al. Expanding the chronic care framework to improve diabetes management: the REACH case study. Prog Community Health Partnersh 2010;4(1):65-79.	not reported	not reported	NA	not reported	not reported	Community, health professional training, community health education via outreach and media.	not reported
	Kelley	2005	Kelley MA, Baldyga W, Barajas F, Rodriguez-Sanchez M. Capturing change in a community--university partnership: Si Se Puede! Project. Prev Chronic Dis 2005 Apr;2(2):A22.	not reported	not reported	NA	not reported	not reported	Community capacity building	not reported
	Margolis	2001	Margolis PA, Stevens R, Bordley WC, Stuart J, Harlan C, Keyes-Elstein L, et al. From concept to application: the impact of a community-wide intervention to improve the delivery of preventive services to children. Pediatrics 2001 Sep;108(3):E42.	105	historical usual care control cohort	103	not reported	healthcare department staff who were trained as counselors by the researchers	Training and ongoing consultation, including home visiting to mothers; office-systems approach to primary care practices.	not reported
	Nash	2006	Nash D, Azeez S, Vlahov D, Schori M. Evaluation of an intervention to increase screening colonoscopy in an urban public hospital setting. J Urban Health 2006 Mar;83(2):231-43.	470	pre-post design usual care	1297	not reported	patient navigator	Patient navigation and a direct endoscopic referral system	not reported
	Parker	2008	Parker EA, Israel BA, Robins TG, Mentz G, Xihong L, Brakefield-Caldwell W, et al. Evaluation of Community Action Against Asthma: a community health worker intervention to improve children's asthma-related health by reducing household environmental triggers for asthma. Health Educ Behav 2008 Jun;35(3):376-95.	166	booklet, then delayed intervention after 1 yr	162	0.77	community health worker	Education and training via household visits, to develop a household action plan; participants were given allergen reducing products to use in the home	2 initial home visits then home visits every 6 weeks for one year
	Parker	2003	Parker EA, Israel BA, Williams M, Brakefield-Caldwell W, Lewis TC, Robins T, et al. Community action against asthma: examining the partnership process of a community-based participatory research project. J Gen Intern Med 2003 Jul;18(7):558-67.		not reported	qualitative N=23	not reported	not reported	Partnership planning using qualitative interviews conducted with steering committee members to determine how well the program was implementing a CBPR approach	not reported
	Plescia	2008	Plescia M, Groblewski M, Chavis L. A lay health advisor program to promote community capacity and change among change agents. Health Promot Pract 2008 Oct;9(4):434-9.	not reported	not reported	12	not reported	not reported	Training via meetings with the lay health advisors	monthly meetings with lay health advisors over a 2 year period
	Rosamond	2000	Rosamond WD, Ammerman AS, Holliday JL, Tawney KW, Hunt KJ, Keyserling TC, et al. Cardiovascular disease risk factor intervention in low-income women: the North Carolina WISEWOMAN project. Prev Med 2000 Oct;31(4):370-9.	959	usual care	998	59% returned for all 3 counseling visits	healthcare department staff who were trained as counselors by the researchers	Educational sessions, healthy eating cookbook, log, and educational materials	3 counseling sessions spanning 6 months
	Schensul	2009	Schensul JJ, Radda K, Coman E, Vazquez E. Multi-level intervention to prevent influenza infections in older low income and minority adults. Am J Community Psychol 2009 Jun;43(3-4):313-29.	73	no intervention	107	not reported	VIP Committee composed of building residents who then promoted influenza vaccination to the other building residents	Capacity-building to provide in-kind resources, information and vaccine; support flu clinics	2 flu fairs were organized and promoted by the VIP committee after they received training
	Stoddard	2004	Stoddard AM, Palombo R, Troped PJ, Sorensen G, Will JC. Cardiovascular disease risk reduction: the Massachusetts WISEWOMAN project. J Womens Health (Larchmt ) 2004 Jun;13(5):539-46.	475	screening and risk factor assessment, brief counseling and referral, and pt educ materials	600	0.77	healthcare department staff who were trained as counselors by the researchers	Services included one-on-one nutritional and physical activity assessments and counseling, individual and group education, and behavioral intervention activities. Agency staff also promoted opportunities for social support and social interaction by implementing women’s groups.	not reported
	Wynn	2011	Wynn TA, Taylor-Jones MM, Johnson RE, Bostick PB, Fouad M. Using community-based participatory approaches to mobilize communities for policy change. Fam Community Health 2011 Jan;34 Suppl 1:S102-S114.	not reported	not reported	not reported	not reported	coalition members and partners	Training sessions.	8 monthly trainings
a Processes of implementation includes: extent, fidelity and/or quality; Processes using IOM criteria are: safety, effectiveness, patient-centeredness, timeliness, efficiency

## Sheet: Intervention
Article Name
Allard, N. 2006. Day surgery and recovery in women with a suspicious breast lesion: evaluation of a psychoeducational nursing intervetnion. Can Oncol Nurs J, 16, 137-53.
Anderson, K.O., et al. 2004. Pain education for underserved minority cancer patients: a randomized controlled trial. J Clin Oncol, 22, 4918-4925.
Arathuzik, D. 1994. Effects of cognitive-behavioral stratgies on pain in cancer patients. Cancer Nurs, 17, 207-214.
Bozcuk H, Kolagasi O, Samur M, et al. A brief information sheet on opioid effects improves quality of life in cancer patients on opioids. Internet Journal of Pain, Symptom Control & Palliative Care. 2004;2(2):12p
Chang, M.C., Chang, Y.C., Chiou, J.F., Tsou, T.S. & Liln, C.C. 2002. Overcoming patient-related barriers to cancer pain management for home care patients. Cancer Nurs, 25, 470-476
Changrani J, Lieberman M, Golant M, Rios P, Damman J, Gany F. Online cancer support groups: Experiences with underserved immigrant Latinos. Primary Psychiatry. Oct 2008;15(10):55-62.
Dalton, J.A., Keefe, F.J., Carlson, J., & Youngblood R. (2004). Tailoring cognitive-behavioral treatment for cancer pain. Pain Manag Nurs, 5, 3-18
deWit, R and vanDam, F. 2001. From hospital to home care: a randomized controlled trial of a pain education programme for cancer pateients with chronic pain. Journal of Advanced Nursing, 36, 742-754
deWit, R., vanDam, F., Loonstra, S., Zandbelt, L., vanBuuren, A., van der Heijden, K., Leenhouts, G., Duivenvoorden, H., and Abu-Saad, H.H. 2002. Improving the quality of pain treatment by a tailored pain education programme for cancer pateints in chronic
Domar, A.D., Noe, J.N., Benson, H. 1987. The preoperative use of the relaxation response with ambulatory surgery patients. J Human Stress, 13, 101-107.
Ferrell, B.R., etal. 1993. Development and implementation of a pain education program. Cancer, 72, 426-432.
Goodwin, et al. 2001. The effect of group psychosocial support on survival in metastatic breast cancer. N Engl J Med, 345, 1719-26
Keefe, F.J., Ahles, T.A., Sutton, L., Dalton, J.A., Baucom, D., Pope, M.S., Knowles, V., McKinstry, E., Furstenberg, C., Syrjala, K., Waters, S.J., McKee, D., McBride, C., Rumble, M., and Scipio, C. 2005. Partner-guided cancer pain management at the end o
Kalauokalani, D., Franks, P., Oliver, J.W., Meyers, F.J., and Kravitz, R.L. 2007. Can patient coaching reduce racial/ethnic disparities in cancer pain control? Secondary analysis of a randomized controlled trial. Pain Med, 8, 17-24.,
Kroenke K, Theobald D, Wu J, Norton K, Morrison G, Carpenter J, Tu W. 2010 Effect of telecare management on pain and depression in patients with cancer: a randomized trial. JAMA 304(2):163-71.
Kwekkeboom, K. L. (2003). "Music versus distraction for procedural pain and anxiety in patients with cancer." Oncol Nurs Forum 30(3): 433-40.
Lai, Y.H., Guo, S.L., Keefe, F.J., Tsai, S.L., Chien, C.C., Sung, Y.C., and Chen, M.L. 2004. Effects of brief pain educaion on hospitalized cancer patients with moderate to severe pain. Support Care Cancer, 12, 645-652.
Lang, E.V., Berbaum, K.S., Pauker, S.G., Faintuch, S., Salazar, G.M., Lutgendorf, S., Laser, E., Logan, H., and Spiegel, D. 2008. Beneficial effects of hypnosis and adverse effects of empathic attention during percutaneous tumor treatment: When being nice
Lin, C.C., Chou, P.L., Wu, S.L., Chang, Y.C., and Lai, Y.L. 2006. Long-term effectiveness of a patient and family pain education program on overcoming barriers to management of cancer pain. Pain, 122, 271-281.
Miaskowski, C., M. Dodd, et al. (2004). "Randomized clinical trial of the effectiveness of a self-care intervention to improve cancer pain management." J Clin Oncol 22(9): 1713-20.
Montgomery, G.H., Bovbjerg, D.H., Schnur, J.B., Daniel, D., Goldfarb, A., Weitz, C.R., Schechter, C., Graff-Zivin, J., Tatrow, K., Price, D. D., and Silverstein, J.H. 2007. a randomized clinical trial of a brief hypnosis inervention to control side effect
Montgomery GH, Weltz CR, Seltz M, Bovbjerg DH. (2002). Brief presurgery hypnosis erduces distress and pain in excisional breast biopsy patients. International Journal of Clinical and Experimental Hypnosis, 50, 17-32.
Oliver, J.W., etal. 2001. Individualized patient education and coaching to improve pain control among cancer outpatients. Journal of Clinical Oncology, 19, 2206-2212.
Rimer, B., etal. 1987. Enhancing cancer pain control regimens through patient education. Patient Education and Counseling, 10, 267-277.
Sloman, R. 1994. The use of relaxation for the promotion of comfort and pain relief in persons with advanced cancer. Contemp Nurse, 3, 6-12.
Spiegel D., Bloom J.R. 1983. Group therapy and hypnosis reduce metastatic breast carcinoma pain, Psychosom Med, 45, 333-339
Syrjala, K. L., C. Cummings, et al. (1992). "Hypnosis or cognitive behavioral training for the reduction of pain and nausea during cancer treatment: a controlled clinical trial." Pain 48(2): 137-46.
Syrjala, K.; Abrams, J.; Polissar, N.; Hansberry, J.; Robison, J.; DuPen, S.;Stillman, M.; et al (2008). Patient training in cancer pain management using integrated print and video materials: A multisite randomized controlled trial. Pain, 135, 175-186.
Tsai P.S, Chen P.L, et al. (2007). "Effects of electromyography biofeedback-assisted relaxation on pain in patients with advanced cancer in a palliative care unit." Cancer Nursing 30(5): 347-353.
Vallieres, I., et al. 2006. Effectiveness of a clinical intervention in improving pain control in outpatients with cancer treated by radiation therapy. Int J Radia Oncol Biol Phys, 66, 234-237.
Ward, S., H. S. Donovan, et al. (2000). "An individualized intervention to overcome patient-related barriers to pain management in women with gynecologic cancers." Res Nurs Health 23(5): 393-405.
Ward, S., Donovan, H., Gunnarsdottir, S., Serlin, R.C., Shapiro, G.R., Hughes, S. 2008. A randomized trial of a representational intervention to decrease cancer pain (RIDcancerPain). Health Psychol, 27, 59-67.
Wilkie, D.J., Williams, A.R., Grevstad, P., and Medwa, J. 1995, Coaching persons with lung cancer to report sensory pain. Cancer Nurs, 18, 7-15
Yates, P., Edwards, H., Nash, R., Aranda, S., Purdie, D., Najman, J., Skerman, H., and Walsh, A. 2004. A randomized controlled trial of a nurse-administered educational intervention for improving cancer pain management in ambulatory settings. Patient Educ
